# Supplementary material for: Efficient asymmetric hydrogenation of quinolines in neat water catalyzed by chiral cationic Ru-diamine complexes
Source: Royal Society of Chemistry journal article supplement (doi:10.1039/c4cy00418c), 2014-01-01
Supplement: c4cy00418c1.pdf [file c4cy00418c1.pdf]

Supporting Information for

## Efficient asymmetric hydrogenation of quinolines in neat water catalyzed by chiral cationic Ru-diamine complexes

Zhusheng Yang,<sup>[a,b]</sup> Fei Chen,<sup>\*[a]</sup> Yan-Mei He,<sup>[a]</sup> Nianfa Yang<sup>\*[b]</sup> and Qing-Hua Fan<sup>\*[a]</sup>

<sup>[a]</sup> Beijing National Laboratory for Molecular Sciences, CAS Key Laboratory of Molecular Recognition and Function, Institute of Chemistry and Graduate School, Chinese Academy of Sciences, Beijing 100190 (P. R. China); E-mail: [fanqh@iccas.ac.cn](mailto:fanqh@iccas.ac.cn)

<sup>[b]</sup> Key Laboratory of Environmentally Friendly Chemistry of the Ministry of Education, College of Chemistry, Xiangtan University, Xiangtan, Hunan 411105, (P. R. China)

### Contents

|                                                                              |     |
|------------------------------------------------------------------------------|-----|
| 1. General information .....                                                 | S2  |
| 2. Optimization of conditions for asymmetric hydrogenation of 1a .....       | S2  |
| 3. Asymmetric hydrogenation of quinolines in undegassed water .....          | S4  |
| 4. Scaled-up synthesis of 6-fluoro-2-methyl-1,2,3,4-tetrahydroquinoline..... | S11 |
| 5. The determination of substrate solubility in water.....                   | S12 |
| 6. Reference .....                                                           | S13 |
| 7. <sup>1</sup> H and <sup>13</sup> C NMR of the reduced products .....      | S14 |
| 8. HPLC spectra of racemic and chiral products .....                         | S25 |

## 1. General information

Unless otherwise noted, all experiments were carried out by using standard Schlenk techniques in undegassed water without the use of glovebox.  $^1\text{H}$  NMR and  $^{13}\text{C}$  NMR spectra were recorded on a Bruker Model Avance DMX 300 Spectrometer ( $^1\text{H}$  300 MHz and  $^{13}\text{C}$  75 MHz, respectively). Chemical shifts ( $\delta$ ) were given in ppm and were referenced to residual solvent or TMS peaks. Optical rotations were measured with Rudolph Autopl VI polarimeter. HPLC analyses were performed on a VARIAN PROSTAR 210 liquid chromatograph. The water was purified by ULUPURE UPHW-III-90T ultra-pure grade water system. All other chemicals were used as received from Aldrich or Acros without further purification. The catalysts were prepared according to the published method.<sup>[1]</sup> Quinolines **1a-1k** were prepared according to the literature procedure and their  $^1\text{H}$  and  $^{13}\text{C}$  NMR data are consistent with the literature data.<sup>[1]</sup>

## 2. Optimization of conditions for asymmetric hydrogenation of **1a**

**Table S1:** Optimization of reaction conditions for the asymmetric hydrogenation of **1a** in water.<sup>[a]</sup>

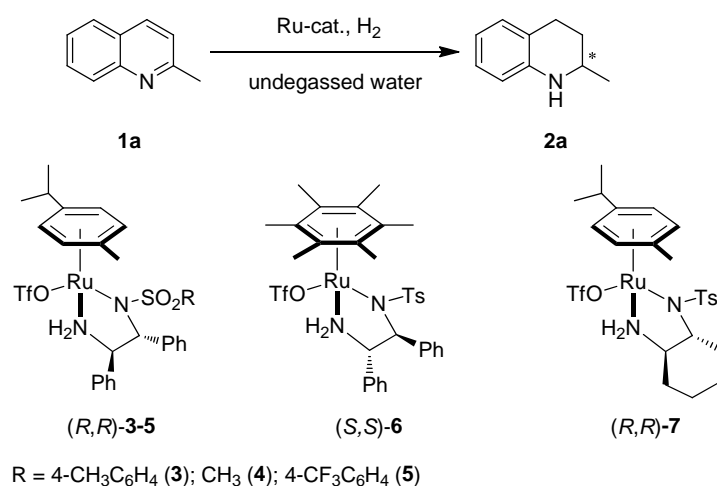

| Entry             | Catalyst                 | H <sub>2</sub> (atm);<br>T (°C) | TfOH<br>(equiv) | Time (h) | Conv.<br>(%) <sup>[b]</sup> | Ee (%) <sup>[c]</sup> |
|-------------------|--------------------------|---------------------------------|-----------------|----------|-----------------------------|-----------------------|
| 1 <sup>[d]</sup>  | ( <i>R,R</i> )- <b>3</b> | 50; 30                          | 0               | 3        | 26                          | 95                    |
| 2 <sup>[d]</sup>  | ( <i>R,R</i> )- <b>3</b> | 50; 30                          | 10              | 3        | 71                          | 94                    |
| 3                 | ( <i>R,R</i> )- <b>3</b> | 50; 30                          | 5               | 3        | >99                         | 95                    |
| 4                 | ( <i>R,R</i> )- <b>3</b> | 50; 30                          | 10              | 3        | >99                         | 95                    |
| 5                 | ( <i>R,R</i> )- <b>3</b> | 50; 30                          | 10              | 0.5      | 30                          | 95                    |
| 6                 | ( <i>R,R</i> )- <b>3</b> | 50; 30                          | 20              | 3        | >99                         | 94                    |
| 7                 | ( <i>R,R</i> )- <b>3</b> | 10; 30                          | 10              | 3        | 64                          | 95                    |
| 8                 | ( <i>R,R</i> )- <b>3</b> | 30; 30                          | 10              | 3        | >99                         | 96                    |
| 9                 | ( <i>R,R</i> )- <b>3</b> | 80; 30                          | 10              | 3        | >99                         | 96                    |
| 10                | ( <i>R,R</i> )- <b>3</b> | 50; 20                          | 10              | 3        | >99                         | 95                    |
| 11                | ( <i>R,R</i> )- <b>3</b> | 50; 50                          | 10              | 3        | >99                         | 94                    |
| 12                | ( <i>R,R</i> )- <b>4</b> | 50; 30                          | 10              | 3        | >99                         | 92                    |
| 13                | ( <i>R,R</i> )- <b>5</b> | 50; 30                          | 10              | 3        | >99                         | 94                    |
| 14                | ( <i>S,S</i> )- <b>6</b> | 50; 30                          | 10              | 3        | >99                         | 99                    |
| 15                | ( <i>S,S</i> )- <b>6</b> | 50; 30                          | 10              | 3        | >99                         | 99                    |
| 16                | ( <i>R,R</i> )- <b>7</b> | 50; 30                          | 10              | 3        | >99                         | 82                    |
| 17 <sup>[f]</sup> | ( <i>R,R</i> )- <b>3</b> | 50; 50                          | 10              | 12       | >99                         | 94                    |
| 18 <sup>[f]</sup> | ( <i>S,S</i> )- <b>6</b> | 50; 50                          | 10              | 12       | 87                          | 98                    |

[a] Reaction conditions: **1a** (0.2 mmol) in undegassed water (1 mL), Ru-cat. (1.0 mol %), reaction for 3 h. All manipulations were conducted in air, and the autoclave was purged with H<sub>2</sub> three times before reaction. [b] The conversions were determined by <sup>1</sup>H NMR spectroscopy of the crude reaction mixture. [c] The enantiomeric excesses were determined by HPLC with a chiral OJ-H column. [d] All manipulations were conducted under anaerobic conditions (with the use of degassed methanol and glovebox), and the autoclave was purged with H<sub>2</sub> three times before reaction. [e] All manipulations were conducted in air, without purging the autoclave with H<sub>2</sub> before reaction. [f] Substrate/catalyst = 500 (143 mg substrate in 5 mL H<sub>2</sub>O).

### 3. Asymmetric hydrogenation of quinolines in undegassed water

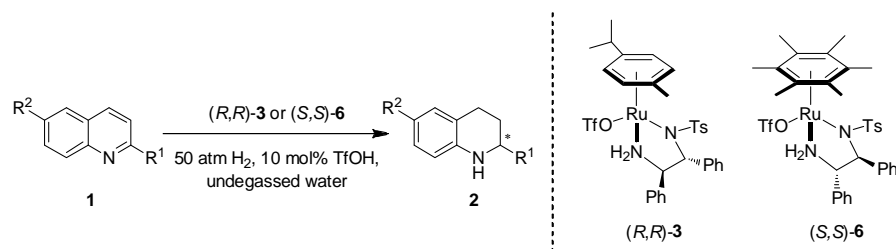

Typical procedure for the asymmetric hydrogenation of quinolones in water: quinolines **1** (0.20 mmol), (*R,R*)-**3** or (*S,S*)-**6** (0.002 mmol, 1.0 mol%), undegassed water (1 mL) and undegassed TfOH (3.0 mg, 0.02 mmol, 10 mol%) were added to a glass tube in air. Then, the tube was placed into a 30 mL stainless steel autoclave and the autoclave was purged with hydrogen gas for 3 times before pressurized with H<sub>2</sub> to 50 atm. The hydrogenation was performed at 30 °C or 50 °C for the specified period of time. After careful releasing of the hydrogen, the reaction mixture was diluted with ethyl acetate (3 mL) and saturated sodium carbonate aqueous solution (2 mL), then stirred for 2 min. The aqueous layer was extracted with ethyl acetate (3 x 3 mL). The combined organic layer was dried over anhydrous sodium sulfate and concentrated to afford the crude product. The conversion of the reaction was based on <sup>1</sup>H NMR spectra. Purification was performed by a silica gel column eluted with petroleum ether/triethylamine (95:5, v/v) to give the pure product. The enantiomeric excesses were determined by chiral HPLC with a chiral column.

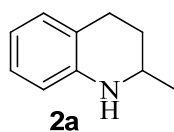

(*S*)-2-Methyl-1,2,3,4-tetrahydroquinoline (**2a**). (Known

compound, see: T. Wang, L. Zhuo, Z. Li, F. Chen, Z. Ding, Y. He,

Q.-H. Fan, J. Xiang, Z.-X. Yu, A. S. C. Chan, *J. Am. Chem. Soc.*

**2011**, *133*, 9878-9891). Isolated yield 95%, 99% ee,  $[\alpha]_D^{25} = -81.0$  (*c* 0.50, CHCl<sub>3</sub>), [Lit.<sup>[1]</sup>  $[\alpha]_D^{RT} = +84.3$  (*c* 0.20, CHCl<sub>3</sub>) 99% ee for *R* enantiomer]; <sup>1</sup>H NMR (300 MHz, CDCl<sub>3</sub>):  $\delta$  (ppm) 7.04-7.00 (m, 2H), 6.60 (t, *J* = 7.35 Hz, 1H), 6.53-6.50 (m, 1H), 3.74 (b, 1H), 3.50-3.39 (m, 1H), 2.95-2.73 (m, 2H), 2.02-1.94 (m, 1H), 1.71-1.58 (m, 1H), 1.26 (d, *J* = 6.30 Hz, 3H); <sup>13</sup>C NMR (75 MHz, CDCl<sub>3</sub>):  $\delta$  (ppm) 144.83, 129.35, 126.77, 121.19, 117.07, 114.11, 47.24, 30.21, 26.68, 22.69; The enantiomeric excess was determined by HPLC on Chiralcel OJ-H column (hexane : isopropanol = 90 : 10, flowing rate = 1.0 mL/min, 25 °C, UV detection at  $\lambda = 254$  nm)  $t_{R1} = 10.1$  min (major),  $t_{R2} = 11.3$  min (minor).

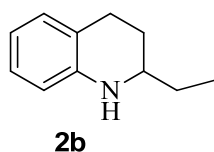

**(R)-2-Ethyl-1,2,3,4-tetrahydroquinoline (2b)**. (Known compound, see: T. Wang, L. Zhuo, Z. Li, F. Chen, Z. Ding, Y. He, Q.-H. Fan, J.

Xiang, Z.-X. Yu, A. S. C. Chan, *J. Am. Chem. Soc.* **2011**, *133*, 9878-9891). Isolated yield 95%, 94% ee,  $[\alpha]_D^{25} = +73.0$  (*c* 0.50, CHCl<sub>3</sub>), [Lit.<sup>[1]</sup>  $[\alpha]_D^{RT} = +80.3$  (*c* 0.19, CHCl<sub>3</sub>) 99% ee for *R* enantiomer]; <sup>1</sup>H NMR (300 MHz, CDCl<sub>3</sub>):  $\delta$  (ppm) 6.99 (t, *J* = 7.05, 2H), 6.63 (t, *J* = 7.20 Hz, 1H), 6.51 (d, *J* = 8.10 Hz, 1H), 3.78 (b, 1H), 3.24-3.16 (m, 1H), 2.89-2.73 (m, 2H), 2.05-1.96 (m, 1H), 1.69-1.51 (m, 3H), 1.02 (t, *J* = 7.50 Hz, 3H); <sup>13</sup>C NMR (75 MHz, CDCl<sub>3</sub>):  $\delta$  (ppm) 144.84, 129.34, 126.82, 121.51, 116.99, 114.12, 53.15, 29.51, 27.69, 26.53, 10.17; The enantiomeric excess was determined by HPLC on Chiralcel OJ-H column (hexane : isopropanol = 90 : 10, flowing rate = 1.0 mL/min, 25 °C, UV detection at  $\lambda = 254$  nm)  $t_{R1} = 9.4$  min (minor),  $t_{R2} = 10.3$  min (major).

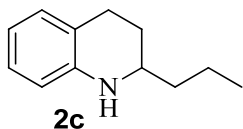

**(R)-2-Propyl-1,2,3,4-tetrahydroquinoline (2c).** (Known

compound, see: T. Wang, L. Zhuo, Z. Li, F. Chen, Z. Ding, Y. He, Q.-H. Fan, J. Xiang, Z.-X. Yu, A. S. C. Chan, *J. Am. Chem. Soc.* **2011**, *133*, 9878-9891). Isolated yield 93%, 94% ee,  $[\alpha]_D^{25} = +78.6$  (*c* 0.50, CHCl<sub>3</sub>), [Lit.<sup>[1]</sup>  $[\alpha]_D^{RT} = +89.0$  (*c* 0.16, CHCl<sub>3</sub>) 99% ee for *R* enantiomer]; <sup>1</sup>H NMR (300 MHz, CDCl<sub>3</sub>):  $\delta$  (ppm) 6.99 (t, *J* = 7.05 Hz, 2H), 6.62 (t, *J* = 7.20 Hz, 1H), 6.50 (d, *J* = 8.10 Hz, 1H), 3.77 (b, 1H), 3.28 (d, *J* = 6.00 Hz 1H), 2.90-2.71 (m, 2H), 2.01-1.94 (m, 1H), 1.69-1.43 (m, 5H), 1.00 (d, *J* = 7.20 Hz, 3H); <sup>13</sup>C NMR (75 MHz, CDCl<sub>3</sub>):  $\delta$  (ppm) 144.84, 129.37, 126.81, 121.50, 116.99, 114.15, 51.42, 39.01, 28.24, 26.55, 19.02, 14.32; The enantiomeric excess was determined by HPLC on Chiralcel OJ-H column (hexane : isopropanol = 90 : 10, flowing rate = 1.0 mL/min, 25 °C, UV detection at  $\lambda = 254$  nm)  $t_{R1} = 8.7$  min (minor),  $t_{R2} = 10.9$  min (major).

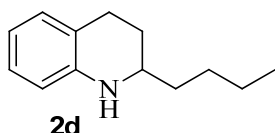

**(R)-2-Butyl-1,2,3,4-tetrahydroquinoline (2d).** (Known

compound, see: T. Wang, L. Zhuo, Z. Li, F. Chen, Z. Ding, Y. He, Q.-H. Fan, J. Xiang, Z.-X. Yu, A. S. C. Chan, *J. Am. Chem. Soc.* **2011**, *133*, 9878-9891). Isolated yield 96%, 93% ee,  $[\alpha]_D^{25} = +73.0$  (*c* 0.50, CHCl<sub>3</sub>), [Lit.<sup>[1]</sup>  $[\alpha]_D^{RT} = +90.4$  (*c* 0.19, CHCl<sub>3</sub>) 99% ee for *R* enantiomer]; <sup>1</sup>H NMR (300 MHz, CDCl<sub>3</sub>):  $\delta$  (ppm) 7.00 (t, *J* = 7.05 Hz, 2H), 6.64 (t, *J* = 7.35 Hz, 1H), 6.51 (d, *J* = 8.10 Hz, 1H), 3.79 (b, 1H), 3.29-3.25 (m, 1H), 2.86-2.78 (m, 2H), 2.03-1.96 (m, 1H), 1.67-1.40 (m, 7H), 0.98 (t, *J* = 6.90 Hz, 3H); <sup>13</sup>C NMR (75 MHz, CDCl<sub>3</sub>):  $\delta$  (ppm) 144.84, 129.34, 126.79, 121.47, 116.96, 114.12, 51.68, 36.53, 28.23, 28.03, 26.55, 22.96, 14.21; The enantiomeric excess was determined by HPLC on Chiralcel OJ-H

column (hexane : isopropanol = 90 : 10, flowing rate = 1.0 mL/min, 25 °C, UV detection at  $\lambda = 254$  nm)  $t_{R1} = 7.6$  min (minor),  $t_{R2} = 8.7$  min (major).

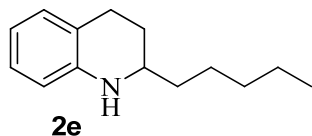

**(R)-2-Pentyl-1,2,3,4-tetrahydroquinoline (2e).** (Known compound, see: T. Wang, L. Zhuo, Z. Li, F. Chen, Z. Ding,

Y. He, Q.-H. Fan, J. Xiang, Z.-X. Yu, A. S. C. Chan, *J. Am. Chem. Soc.* **2011**, *133*, 9878-9891). Isolated yield 91%, 95% ee,  $[\alpha]_D^{25} = +106.0$  (*c* 0.50, CHCl<sub>3</sub>), [Lit.<sup>[1]</sup>  $[\alpha]_D^{RT} = +87.3$  (*c* 0.20, CHCl<sub>3</sub>) 99% ee for *R* enantiomer]; <sup>1</sup>H NMR (300 MHz, CDCl<sub>3</sub>):  $\delta$  (ppm) 6.99 (t, *J* = 7.05 Hz, 2H), 6.63 (t, *J* = 7.20 Hz, 1H), 6.51 (d, *J* = 8.10 Hz, 1H), 3.77 (b, 1H), 3.31-3.23 (m, 1H), 2.89-2.71 (m, 2H), 2.04-1.95 (m, 1H), 1.70-1.37 (m, 9H), 0.95 (t, *J* = 6.75 Hz, 3H); <sup>13</sup>C NMR (75 MHz, CDCl<sub>3</sub>):  $\delta$  (ppm) 144.83, 129.35, 126.80, 121.50, 116.99, 114.15, 51.71, 36.80, 32.08, 28.23, 26.56, 25.52, 22.77, 14.18; The enantiomeric excess was determined by HPLC on Chiralcel OJ-H column (hexane : isopropanol = 90 : 10, flowing rate = 1.0 mL/min, 25 °C, UV detection at  $\lambda = 254$  nm)  $t_{R1} = 6.8$  min (minor),  $t_{R2} = 7.4$  min (major).

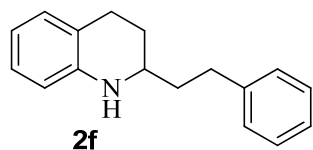

**(R)-2-Phenethyl-1,2,3,4-tetrahydroquinoline (2f).**

(Known compound, see: T. Wang, L. Zhuo, Z. Li, F. Chen,

Z. Ding, Y. He, Q.-H. Fan, J. Xiang, Z.-X. Yu, A. S. C. Chan, *J. Am. Chem. Soc.* **2011**, *133*, 9878-9891). Isolated yield 95%, 93% ee,  $[\alpha]_D^{25} = +78.6$  (*c* 0.50, CHCl<sub>3</sub>), [Lit.<sup>[1]</sup>  $[\alpha]_D^{RT} = +88.9$  (*c* 0.27, CHCl<sub>3</sub>) 99% ee for *R* enantiomer]; <sup>1</sup>H NMR (300 MHz, CDCl<sub>3</sub>):  $\delta$  (ppm) 7.31-7.19 (m, 5H), 6.95 (t, *J* = 7.05 Hz, 2H), 6.59 (t, *J* = 7.35 Hz, 1H), 6.43 (d, *J* = 7.80 Hz, 1H), 3.72 (b, 1H), 3.32-3.23 (m, 1H), 2.80-2.69 (m, 4H),

2.02-1.93 (m, 1H), 1.85-1.78 (m, 2H), 1.72-1.61 (m, 1H);  $^{13}\text{C}$  NMR (75 MHz,  $\text{CDCl}_3$ ):  $\delta$  (ppm) 144.60, 141.95, 129.36, 128.59, 128.46, 126.84, 126.07, 121.39, 117.14, 114.25, 51.22, 38.35, 32.27, 28.07, 26.32; The enantiomeric excess was determined by HPLC on Chiralcel AS-H column (hexane : isopropanol = 95 : 5, flowing rate = 0.6 mL/min, 25 °C, UV detection at  $\lambda = 254$  nm)  $t_{\text{R1}} = 9.4$  min (minor),  $t_{\text{R2}} = 10.5$  min (major).

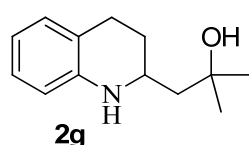

**(S)-2-methyl-1-(1,2,3,4-tetrahydroquinolin-2-yl)propan-2-ol**

**(2g)**. (Known compound, see: T. Wang, L. Zhuo, Z. Li, F. Chen,

Z. Ding, Y. He, Q.-H. Fan, J. Xiang, Z.-X. Yu, A. S. C. Chan, *J. Am. Chem. Soc.* **2011**, *133*, 9878-9891). Isolated yield 92%, 93% ee,  $[\alpha]_{\text{D}}^{25} = +52.6$  ( $c$  0.50,  $\text{CHCl}_3$ ), [Lit.<sup>[1]</sup>  $[\alpha]_{\text{D}}^{\text{RT}} = +80.3$  ( $c$  0.19,  $\text{CHCl}_3$ ) 99% ee for *S* enantiomer];  $^1\text{H}$  NMR (300 MHz,  $\text{CDCl}_3$ ):  $\delta$  (ppm) 6.96 (t,  $J = 7.20$  Hz, 2H), 6.60 (t,  $J = 7.35$  Hz, 1H), 6.49 (d,  $J = 7.80$  Hz, 1H), 3.62-3.53 (m, 2H), 2.89-2.83 (m, 1H), 2.78-2.71 (m, 1H), 1.88-1.82 (m, 1H), 1.77-1.57 (m, 2H), 1.33-1.28 (m, 6H);  $^{13}\text{C}$  NMR (75 MHz,  $\text{CDCl}_3$ ):  $\delta$  (ppm) 144.70, 129.35, 126.81, 121.01, 116.80, 114.54, 72.08, 48.91, 48.50, 32.92, 29.88, 27.90, 26.69; The enantiomeric excess was determined by HPLC on Chiralcel OD-H column (hexane : isopropanol = 95 : 5, flowing rate = 0.8 mL/min, 25 °C, UV detection at  $\lambda = 254$  nm)  $t_{\text{R1}} = 13.0$  min (major),  $t_{\text{R2}} = 15.7$  min (minor).

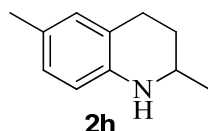

**(S)-2,6-Dimethyl-1,2,3,4-tetrahydroquinoline (2h)**. (Known

compound, see: T. Wang, L. Zhuo, Z. Li, F. Chen, Z. Ding, Y. He,

Q.-H. Fan, J. Xiang, Z.-X. Yu, A. S. C. Chan, *J. Am. Chem. Soc.* **2011**, *133*,



9878-9891). Isolated yield 94%, 99% ee,  $[\alpha]_{\text{D}}^{25} = -81.4$  ( $c$  0.50,  $\text{CHCl}_3$ ), [Lit.<sup>[1]</sup>  $[\alpha]_{\text{D}}^{\text{RT}} = +80.3$  ( $c$  0.19,  $\text{CHCl}_3$ ) 98% ee for *R* enantiomer];  $^1\text{H}$  NMR (300 MHz,  $\text{CDCl}_3$ ):  $\delta$  (ppm) 6.81 (d,  $J = 6.60$  Hz, 2H), 6.44 (d,  $J = 8.40$  Hz, 1H), 3.59 (b, 1H), 3.42-3.36 (m, 1H), 2.91-2.68 (m, 2H), 2.24 (s, 3H), 1.99-1.90 (m, 1H), 1.67-1.56 (m, 1H), 1.23 (d,  $J = 6.30$  Hz, 3H);  $^{13}\text{C}$  NMR (75 MHz,  $\text{CDCl}_3$ ):  $\delta$  (ppm) 142.55, 129.93, 127.32, 126.34, 121.32, 114.35, 47.42, 30.46, 26.70, 22.71, 20.52; The enantiomeric excess was determined by HPLC on Chiralcel OJ-H column (hexane : isopropanol = 90 : 10, flowing rate = 1.0 mL/min, 25 °C, UV detection at  $\lambda = 254$  nm)  $t_{\text{R}1} = 12.1$  min (major),  $t_{\text{R}2} = 15.0$  min (minor).

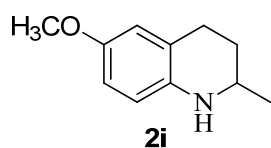

**(S)- 6-Methoxy-2-methyl-1,2,3,4-tetrahydroquinoline (2i).**

(Known compound, see: T. Wang, L. Zhuo, Z. Li, F. Chen, Z.

Ding, Y. He, Q.-H. Fan, J. Xiang, Z.-X. Yu, A. S. C. Chan, *J. Am. Chem. Soc.* **2011**, *133*, 9878-9891). Isolated yield 94%, 99% ee,  $[\alpha]_{\text{D}}^{25} = -81.0$  ( $c$  0.50,  $\text{CHCl}_3$ ), [Lit.<sup>[1]</sup>  $[\alpha]_{\text{D}}^{\text{RT}} = +80.3$  ( $c$  0.19,  $\text{CHCl}_3$ ) 99% ee for *R* enantiomer];  $^1\text{H}$  NMR (300 MHz,  $\text{CDCl}_3$ ):  $\delta$  (ppm) 6.61 (t,  $J = 8.55$  Hz, 2H), 6.45 (d,  $J = 8.40$  Hz, 1H), 3.73 (s, 3H), 3.49-3.28 (m, 2H), 2.91-2.67 (m, 2H), 1.96-1.88 (m, 1H), 1.65-1.51 (m, 1H), 1.20 (d,  $J = 6.30$  Hz, 3H);  $^{13}\text{C}$  NMR (75 MHz,  $\text{CDCl}_3$ ):  $\delta$  (ppm) 151.98, 139.04, 122.64, 115.44, 114.76, 112.97, 55.93, 47.61, 30.45, 27.05, 22.69; The enantiomeric excess was determined by HPLC on Chiralcel OJ-H column (hexane : isopropanol = 90 : 10, flowing rate = 1.0 mL/min, 25 °C, UV detection at  $\lambda = 254$  nm)  $t_{\text{R}1} = 8.2$  min (minor),  $t_{\text{R}2} = 9.0$  min (major).

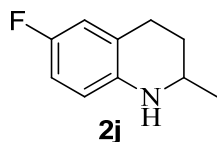

**(S)-6-Fluoro-2-methyl-1,2,3,4-tetrahydroquinoline (2j).** (Known

compound, see: T. Wang, L. Zhuo, Z. Li, F. Chen, Z. Ding, Y. He, Q.-H. Fan, J. Xiang, Z.-X. Yu, A. S. C. Chan, *J. Am. Chem. Soc.* **2011**, *133*, 9878-9891). Isolated yield 94%, 99% ee,  $[\alpha]_D^{25} = -81.2$  (*c* 0.50, CHCl<sub>3</sub>), [Lit.<sup>[1]</sup>  $[\alpha]_D^{RT} = +80.3$  (*c* 0.19, CHCl<sub>3</sub>) 98% ee for *R* enantiomer]; <sup>1</sup>H NMR (300 MHz, CDCl<sub>3</sub>):  $\delta$  (ppm) 6.71-6.65 (m, 2H), 6.43-6.38 (m, 1H), 3.54 (b, 1H), 3.40-3.31 (m, 1H), 2.89-2.66 (m, 2H), 1.96-1.88 (m, 1H), 1.63-1.50 (m, 1H), 1.21 (d, *J* = 6.30 Hz, 3H); <sup>13</sup>C NMR (75 MHz, CDCl<sub>3</sub>):  $\delta$  (ppm) 154.07, 141.09, 122.64, 122.55, 115.65, 115.37, 114.88, 114.78, 113.42, 113.13, 47.43, 30.01, 26.84, 22.62; The enantiomeric excess was determined by HPLC on Chiralcel OD-H column (hexane : isopropanol = 90 : 10, flowing rate = 1.0 mL/min, 25 °C, UV detection at  $\lambda = 254$  nm)  $t_{R1} = 5.2$  min (minor),  $t_{R2} = 5.9$  min (major).

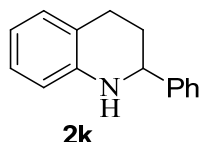

**(S)-2-Phenyl-1,2,3,4-tetrahydroquinoline (2k).** (Known compound,

see: T. Wang, L. Zhuo, Z. Li, F. Chen, Z. Ding, Y. He, Q.-H. Fan, J. Xiang, Z.-X. Yu, A. S. C. Chan, *J. Am. Chem. Soc.* **2011**, *133*, 9878-9891). Isolated yield 92%, 63% ee,  $[\alpha]_D^{25} = -35.6$  (*c* 0.50, CHCl<sub>3</sub>), [Lit.<sup>[1]</sup>  $[\alpha]_D^{RT} = +36.8$  (*c* 0.95, CHCl<sub>3</sub>) 92% ee for *R* enantiomer]; <sup>1</sup>H NMR (300 MHz, CDCl<sub>3</sub>):  $\delta$  (ppm) 7.44-7.32 (m, 5H), 7.05 (t, *J* = 6.90 Hz, 2H), 6.69 (t, *J* = 7.35 Hz, 1H), 6.57 (d, *J* = 8.10 Hz, 1H), 4.49-4.45 (m, 1H), 4.06 (b, 1H), 2.96-2.91 (m, 1H), 2.81-2.73 (m, 1H), 2.19-2.01 (m, 2H); <sup>13</sup>C NMR (75 MHz, CDCl<sub>3</sub>):  $\delta$  (ppm) 144.93, 144.84, 129.41, 128.69, 127.55, 127.02, 126.66, 120.98, 117.26, 114.09, 56.36, 31.10, 26.50; The enantiomeric excess was determined by HPLC on Chiralcel OD-H column (hexane : isopropanol = 90 : 10,

flowing rate = 0.6 mL/min, 25 °C, UV detection at  $\lambda = 254$  nm)  $t_{R1} = 15.4$  min (major),  
 $t_{R2} = 20.8$  min (minor).

#### 4. Scaled-up synthesis of 6-fluoro-2-methyl-1,2,3,4-tetrahydroquinoline

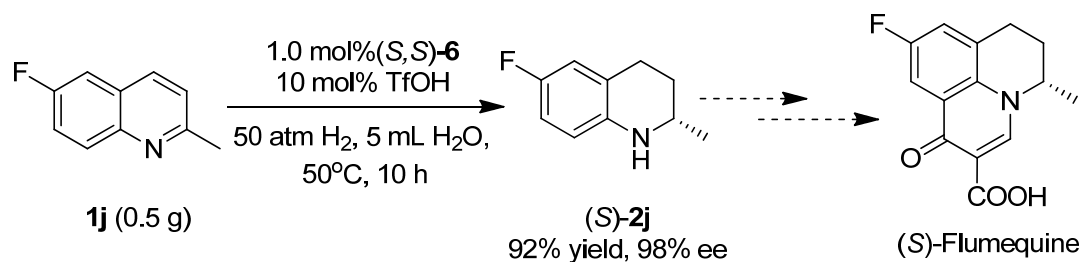

Quinoline **1j** (0.5 g, 3.10 mmol), (*S,S*)-**6** (0.031 mmol, 1.0 mol%), undegassed water (5 mL) and undegassed CF<sub>3</sub>SO<sub>3</sub>H (46.5 mg, 0.31 mmol, 10 mol%) were added to a glass tube in air. Then, the tube was placed into a 30 mL stainless steel autoclave and the autoclave was purged with hydrogen gas for 3 times before pressurized with H<sub>2</sub> to 50 atm. The hydrogenation was performed at 50 °C for 10 h. After careful releasing of the hydrogen, the reaction mixture was diluted with ethyl acetate (3 mL) and saturated sodium carbonate aqueous solution (2 mL), then stirred for 2 min. The aqueous layer was extracted with ethyl acetate (3 x 3 mL). The combined organic layer was dried over anhydrous sodium sulfate and concentrated to afford the crude product. The full conversion of the reaction was based on <sup>1</sup>H NMR spectra. Purification was performed by a silica gel column eluted with petroleum ether/triethylamine (95:5, v/v) to give the pure product as a yellow solid (460 mg, 92% yield, 98% ee). The enantiomeric excess was determined by HPLC on Chiralcel OD-H column (hexane : isopropanol = 90 : 10, flowing rate = 1.0 mL/min, 25 °C, UV detection at  $\lambda = 254$  nm)  $t_{R1} = 5.2$  min (minor),  $t_{R2} = 5.9$  min (major).

## **5. The determination of substrate solubility in water**

### **5.1 The determination of solubilities for quinolines **1a** and **1j**:**

2-Methylquinoline (**1a**) (27  $\mu$ L, 0.2 mmol) and D<sub>2</sub>O (1 mL) were added to a glass tube and stirred for 30 min at 20 °C. Then, the reaction mixture was standed overnight. After that, 0.5 mL clear solution was carefully transferred into a NMR tube, then 1.12 mg isopropanol was added into the NMR tube as an internal standard. The solubility of **1a** (4.04 mg/mL) was obtained based on its <sup>1</sup>H NMR spectrum.

The solubility of 6-fluoro-2-methylquinoline (**1j**) (0.84 mg/mL) was obtained with the same method described above.

### **5.2 The determination of solubilities for TfOH protonated quinoline salts:**

The TfOH protonated 2-methylquinoline salt was added into 0.2 mL deionized water in portions until the salt was undissolved and the solubility was obtained as 5.68 g/mL.

The solubility of TfOH protonated 6-fluoro-2-methylquinoline salt (2.12 g/mL) was obtained with the same method described above.

### 5.3 The difference between oil substrate 1a and solid substrate 1j:

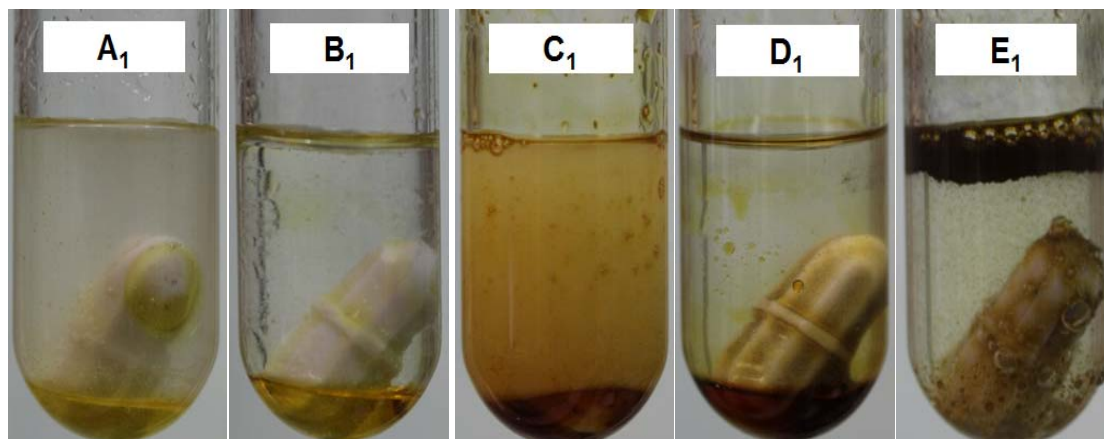

**Figure 1.** Unless noted otherwise, 500 mg 2-methylquinoline in 5 mL deionized water. A<sub>1</sub>: stirred at room temperature; B<sub>1</sub>: added 10 mol% CF<sub>3</sub>SO<sub>3</sub>H; C<sub>1</sub>: added 10 mol% TfOH and 1 mol% catalyst; D<sub>1</sub>: heated in an oil bath at 50 °C for 0.5 h; E<sub>1</sub>: reacted with 50 atm hydrogen at 50 °C for 6 h.

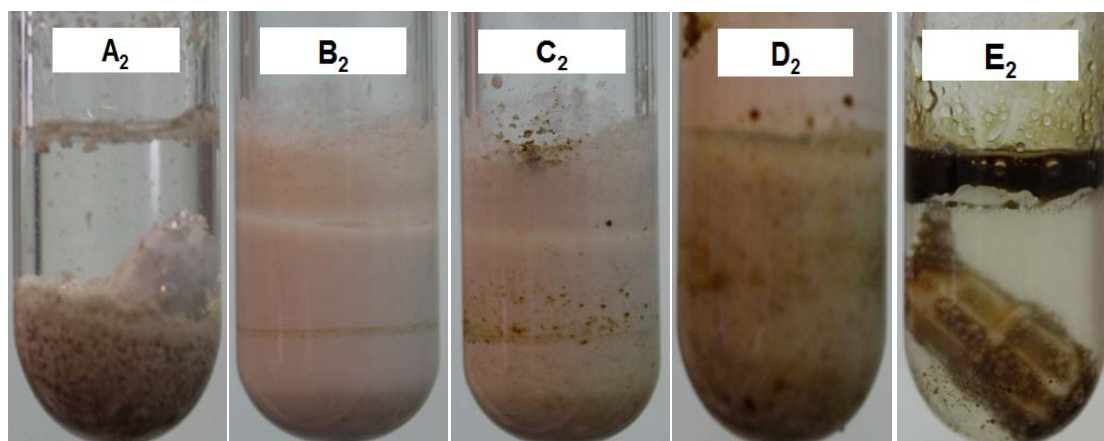

**Figure 2.** Unless noted otherwise, 500 mg 6-fluoro-2-methylquinoline in 5 mL deionized water. A<sub>2</sub>: stirred at room temperature. B<sub>2</sub>: added 10 mol% TfOH; C<sub>2</sub>: added 1 mol% catalyst; D<sub>2</sub>: heated in an oil bath at 50 °C for 0.5 h; E<sub>2</sub>: reacted with 50 atm hydrogen at 50 °C for 6 h.

## 6. Reference

- [1] T. Wang, L. Zhuo, Z. Li, F. Chen, Z. Ding, Y. He, Q.-H. Fan, J. Xiang, Z.-X. Yu, A. S. C. Chan, *J. Am. Chem. Soc.* **2011**, *133*, 9878-9891.

## 7. <sup>1</sup>H and <sup>13</sup>C NMR of products

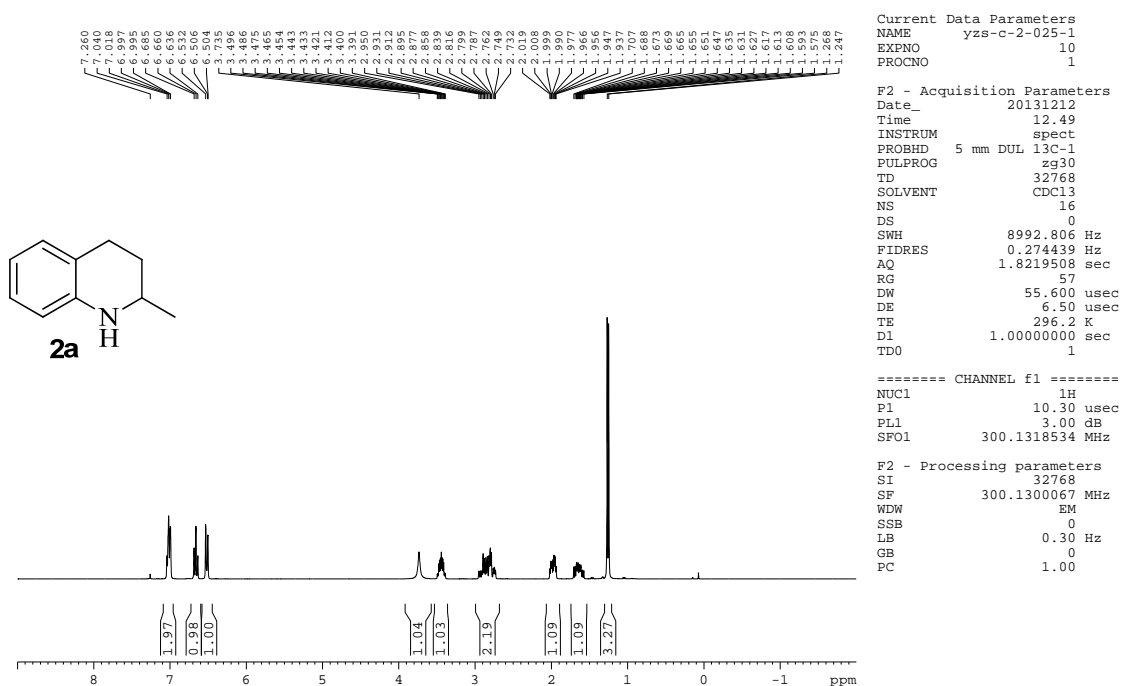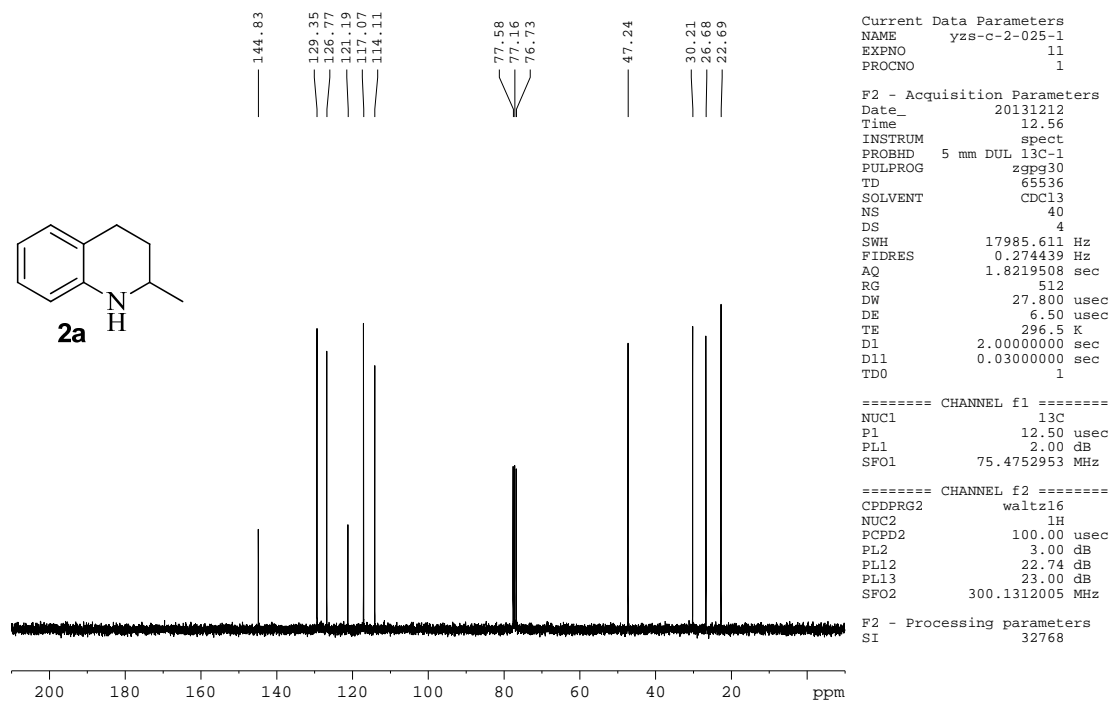

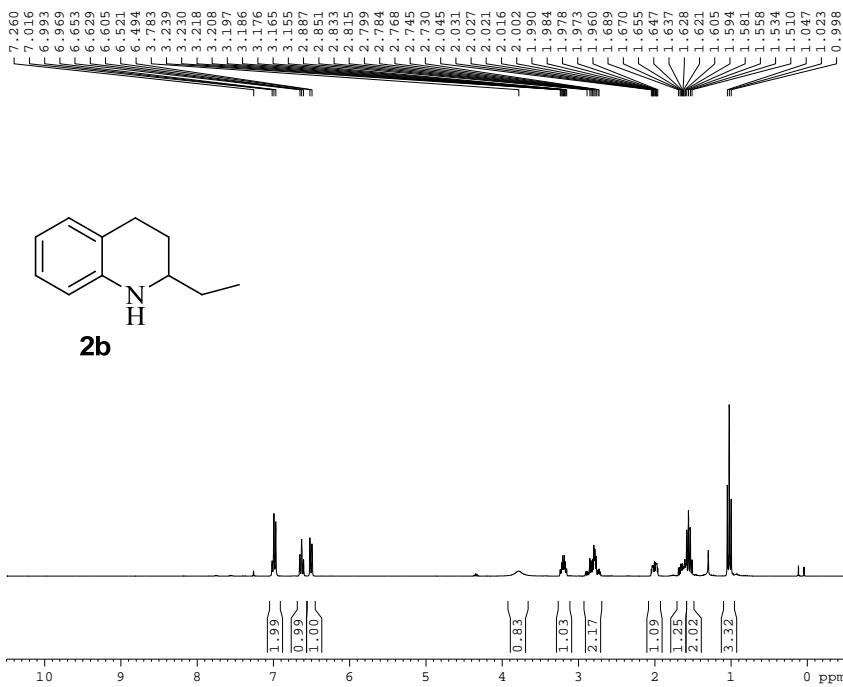

Current Data Parameters  
 NAME yzs-c-2-023-2  
 EXPNO 10  
 PROCNO 1

F2 - Acquisition Parameters  
 Date\_ 20131202  
 Time 21.28  
 INSTRUM spect  
 PROBHD 5 mm DUL 13C-1  
 PULPROG zg30  
 TD 32768  
 SOLVENT CDCl3  
 NS 16  
 DS 0  
 SWH 8992.806 Hz  
 FIDRES 0.274439 Hz  
 AQ 1.8219508 sec  
 RG 71.8  
 DW 55.600 usec  
 DE 6.50 usec  
 TE 297.4 K  
 D1 1.0000000 sec  
 TD0 1

==== CHANNEL f1 =====  
 NUC1 1H  
 P1 10.30 usec  
 PL1 3.00 dB  
 SFO1 300.1318534 MHz

F2 - Processing parameters  
 SI 32768  
 SF 300.1300067 MHz  
 WDW EM  
 SSB 0  
 LB 0.30 Hz  
 GB 0  
 PC 1.00

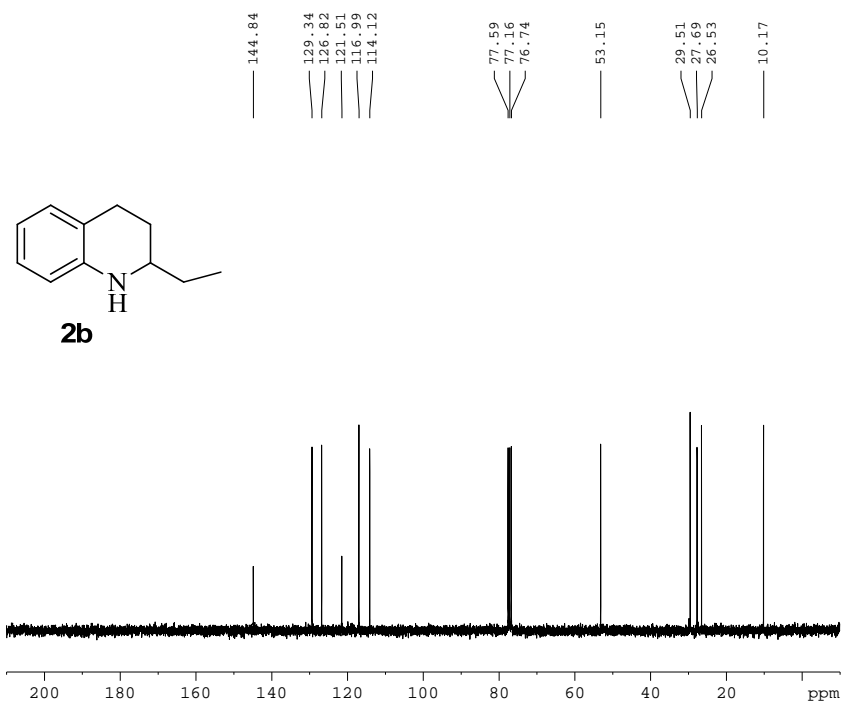

Current Data Parameters  
 NAME yzs-c-2-023-2  
 EXPNO 11  
 PROCNO 1

F2 - Acquisition Parameters  
 Date\_ 20131202  
 Time 21.32  
 INSTRUM spect  
 PROBHD 5 mm DUL 13C-1  
 PULPROG zgpg30  
 TD 65536  
 SOLVENT CDCl3  
 NS 55  
 DS 4  
 SWH 17985.611 Hz  
 FIDRES 0.274439 Hz  
 AQ 1.8219508 sec  
 RG 1625.5  
 DW 27.800 usec  
 DE 6.50 usec  
 TE 297.4 K  
 D1 2.0000000 sec  
 D11 0.0300000 sec  
 TD0 1

==== CHANNEL f1 =====  
 NUC1 13C  
 P1 12.50 usec  
 PL1 2.00 dB  
 SFO1 75.4752953 MHz

==== CHANNEL f2 =====  
 CPDPRG2 waltz16  
 NUC2 1H  
 PCPD2 100.00 usec  
 PL2 3.00 dB  
 PL12 22.74 dB  
 PL13 23.00 dB  
 SFO2 300.1312005 MHz

F2 - Processing parameters  
 SI 32768

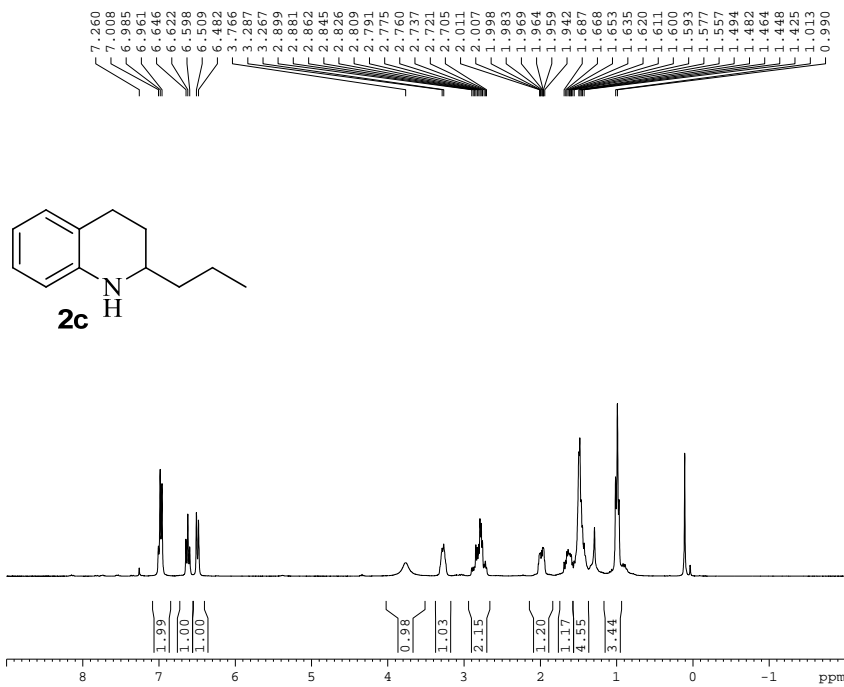

Current Data Parameters  
 NAME yzs-c-2-023-3  
 EXPNO 30  
 PROCNO 1

F2 - Acquisition Parameters  
 Date\_ 20131213  
 Time 21.02  
 INSTRUM spect  
 PROBHD 5 mm DUL 13C-1  
 PULPROG zg30  
 TD 32768  
 SOLVENT CDCl3  
 NS 16  
 DS 0  
 SWH 8992.806 Hz  
 FIDRES 0.274439 Hz  
 AQ 1.8219508 sec  
 RG 71.8  
 DW 55.600 usec  
 DE 6.50 usec  
 TE 295.3 K  
 D1 1.00000000 sec  
 TDO 1

==== CHANNEL f1 =====  
 NUC1 1H  
 P1 10.30 usec  
 PL1 3.00 dB  
 SFO1 300.1318534 MHz

F2 - Processing parameters  
 SI 32768  
 SF 300.1300072 MHz  
 WDW EM  
 SSB 0  
 LB 0.30 Hz  
 GB 0  
 PC 1.00

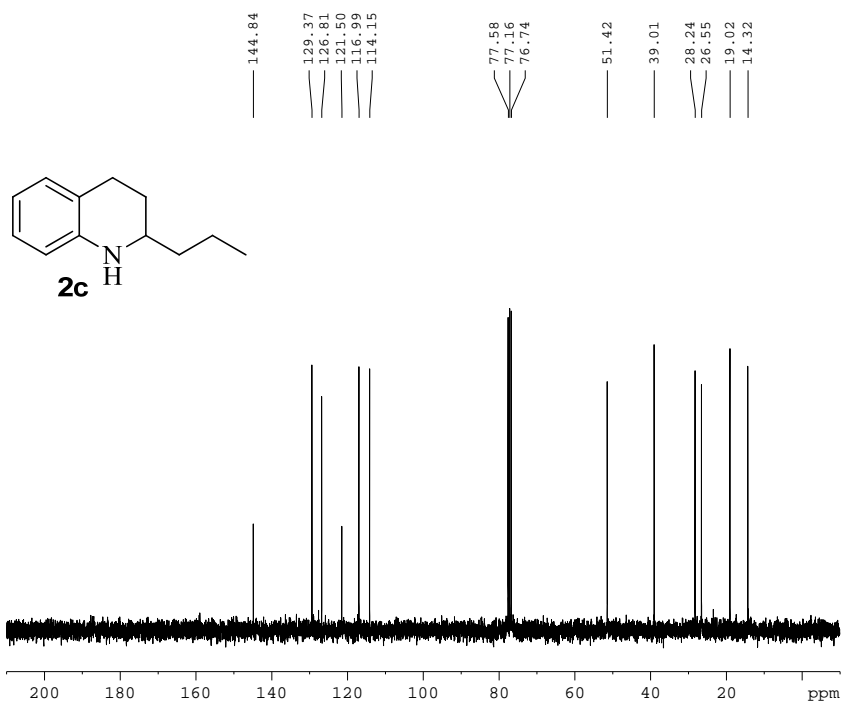

Current Data Parameters  
 NAME yzs-c-2-023-3  
 EXPNO 21  
 PROCNO 1

F2 - Acquisition Parameters  
 Date\_ 20131202  
 Time 21.53  
 INSTRUM spect  
 PROBHD 5 mm DUL 13C-1  
 PULPROG zgpg30  
 TD 65536  
 SOLVENT CDCl3  
 NS 45  
 DS 4  
 SWH 17985.611 Hz  
 FIDRES 0.274439 Hz  
 AQ 1.8219508 sec  
 RG 1625.5  
 DW 27.800 usec  
 DE 6.50 usec  
 TE 297.7 K  
 D1 2.00000000 sec  
 D11 0.03000000 sec  
 TDO 1

==== CHANNEL f1 =====  
 NUC1 13C  
 P1 12.50 usec  
 PL1 2.00 dB  
 SFO1 75.4752953 MHz

==== CHANNEL f2 =====  
 CPDPRG2 waltz16  
 NUC2 1H  
 PCPD2 100.00 usec  
 PL2 3.00 dB  
 PL12 22.74 dB  
 PL13 23.00 dB  
 SFO2 300.1312005 MHz

F2 - Processing parameters  
 SI 32768



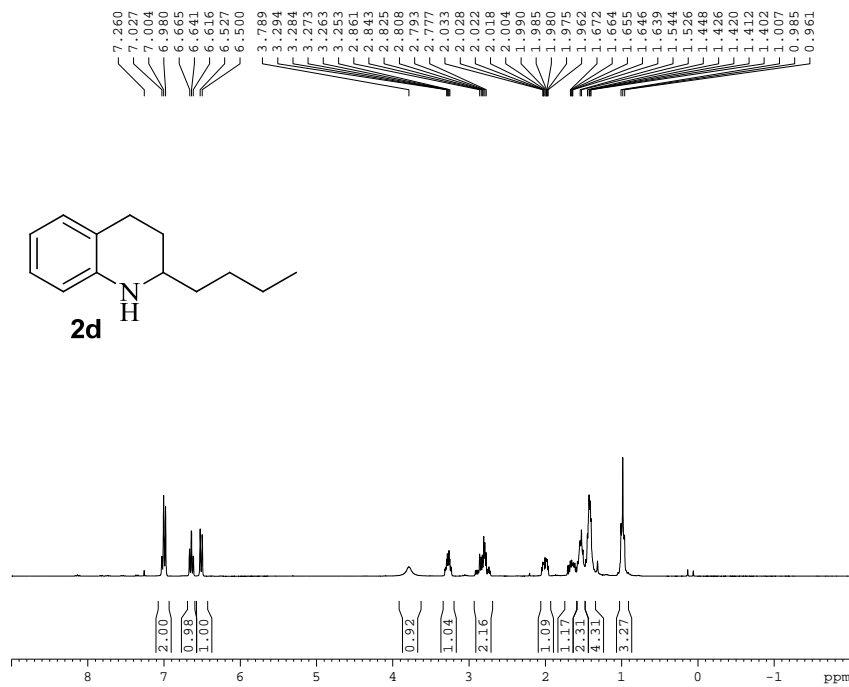

Current Data Parameters  
 NAME yzs-c-2-025-4  
 EXPNO 10  
 PROCNO 1

F2 - Acquisition Parameters  
 Date\_ 20131211  
 Time 11.55  
 INSTRUM spect  
 PROBHD 5 mm DUL 13C-1  
 PULPROG zg30  
 TD 32768  
 SOLVENT CDCl3  
 NS 16  
 DS 0  
 SWH 8992.806 Hz  
 FIDRES 0.274439 Hz  
 AQ 1.8219508 sec  
 RG 40.3  
 DW 55.600 usec  
 DE 6.50 usec  
 TE 296.9 K  
 D1 1.00000000 sec  
 TDO 1

==== CHANNEL f1 =====  
 NUC1 1H  
 P1 10.30 usec  
 PL1 3.00 dB  
 SFO1 300.1318534 MHz

F2 - Processing parameters  
 SI 32768  
 SF 300.1300067 MHz  
 WDW EM  
 SSB 0  
 LB 0.30 Hz  
 GB 0  
 PC 1.00

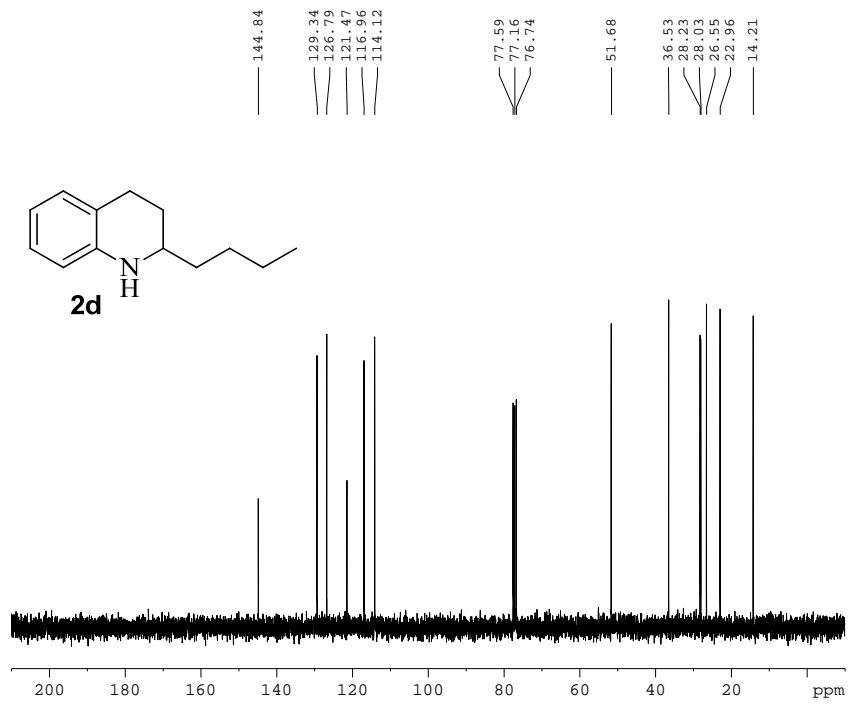

Current Data Parameters  
 NAME YZS-C-2-026-2  
 EXPNO 20  
 PROCNO 1

F2 - Acquisition Parameters  
 Date\_ 20131211  
 Time 22.29  
 INSTRUM spect  
 PROBHD 5 mm DUL 13C-1  
 PULPROG zgpg30  
 TD 65536  
 SOLVENT CDCl3  
 NS 15  
 DS 4  
 SWH 17985.611 Hz  
 FIDRES 0.274439 Hz  
 AQ 1.8219508 sec  
 RG 574.7  
 DW 27.800 usec  
 DE 6.50 usec  
 TE 296.9 K  
 D1 2.00000000 sec  
 D11 0.03000000 sec  
 TDO 1

==== CHANNEL f1 =====  
 NUC1 13C  
 P1 12.50 usec  
 PL1 2.00 dB  
 SFO1 75.4752953 MHz

==== CHANNEL f2 =====  
 CPDPRG2 waltz16  
 NUC2 1H  
 PCPD2 100.00 usec  
 PL2 3.00 dB  
 PL12 22.74 dB  
 PL13 23.00 dB  
 SFO2 300.1312005 MHz

F2 - Processing parameters  
 SI 32768

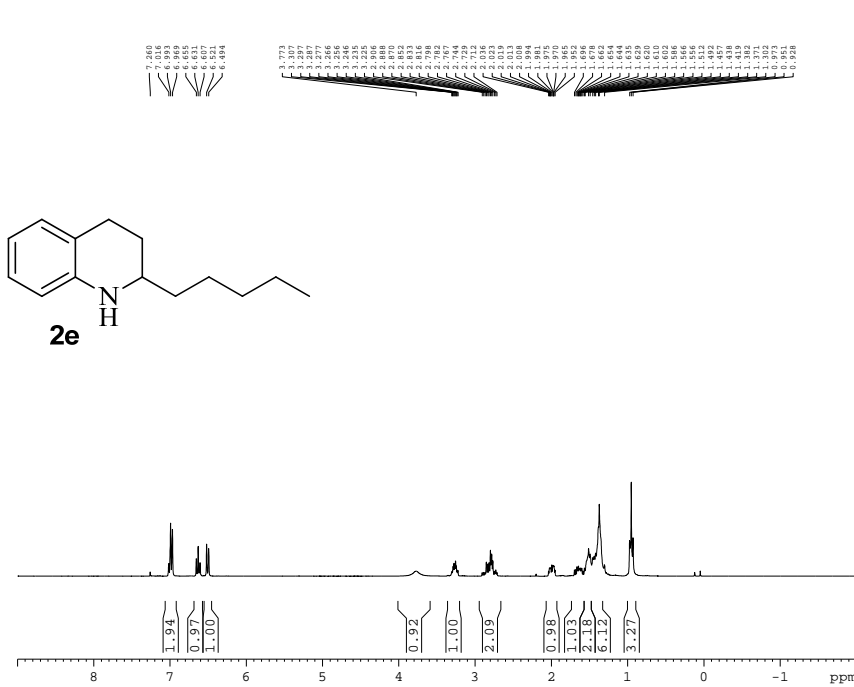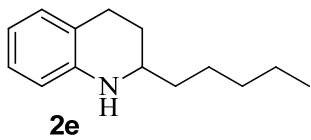

Current Data Parameters  
 NAME yzs-c-2-025-5  
 EXPNO 10  
 PROCNO 1

F2 - Acquisition Parameters  
 Date\_ 20131211  
 Time 22.18  
 INSTRUM spect  
 PROBHD 5 mm DUL 13C-1  
 PULPROG zg30  
 TD 32768  
 SOLVENT CDCl3  
 NS 16  
 DS 0  
 SWH 8992.806 Hz  
 FIDRES 0.274439 Hz  
 AQ 1.8219508 sec  
 RG 57  
 DW 55.600 usec  
 DE 6.50 usec  
 TE 296.8 K  
 D1 1.00000000 sec  
 TD0 1

==== CHANNEL f1 =====  
 NUC1 1H  
 P1 10.30 usec  
 PL1 3.00 dB  
 SFO1 300.1318534 MHz

F2 - Processing parameters  
 SI 32768  
 SF 300.1300067 MHz  
 WDW EM  
 SSB 0  
 LB 0.30 Hz  
 GB 0  
 PC 1.00

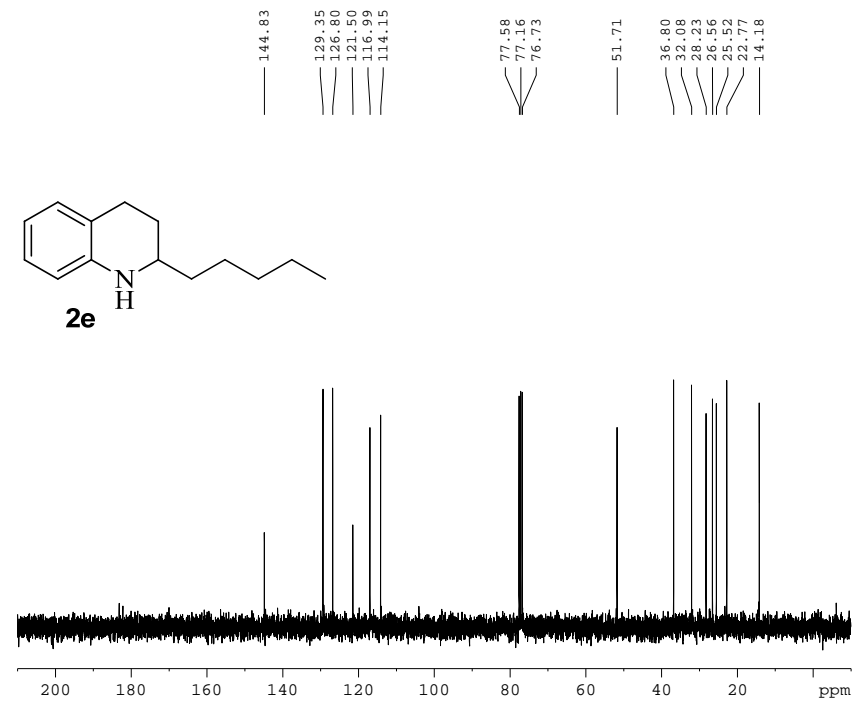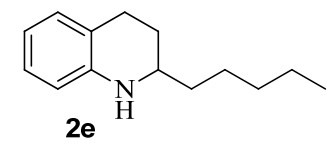

Current Data Parameters  
 NAME yzs-c-2-025-5  
 EXPNO 11  
 PROCNO 1

F2 - Acquisition Parameters  
 Date\_ 20131211  
 Time 22.23  
 INSTRUM spect  
 PROBHD 5 mm DUL 13C-1  
 PULPROG zgpg30  
 TD 65536  
 SOLVENT CDCl3  
 NS 19  
 DS 4  
 SWH 17985.611 Hz  
 FIDRES 0.274439 Hz  
 AQ 1.8219508 sec  
 RG 1149.4  
 DW 27.800 usec  
 DE 6.50 usec  
 TE 296.9 K  
 D1 2.00000000 sec  
 D11 0.03000000 sec  
 TD0 1

==== CHANNEL f1 =====  
 NUC1 13C  
 P1 12.50 usec  
 PL1 2.00 dB  
 SFO1 75.4752953 MHz

==== CHANNEL f2 =====  
 CPDPRG2 waltz16  
 NUC2 1H  
 PCPD2 100.00 usec  
 PL2 3.00 dB  
 PL12 22.74 dB  
 PL13 23.00 dB  
 SFO2 300.1312005 MHz

F2 - Processing parameters  
 SI 32768

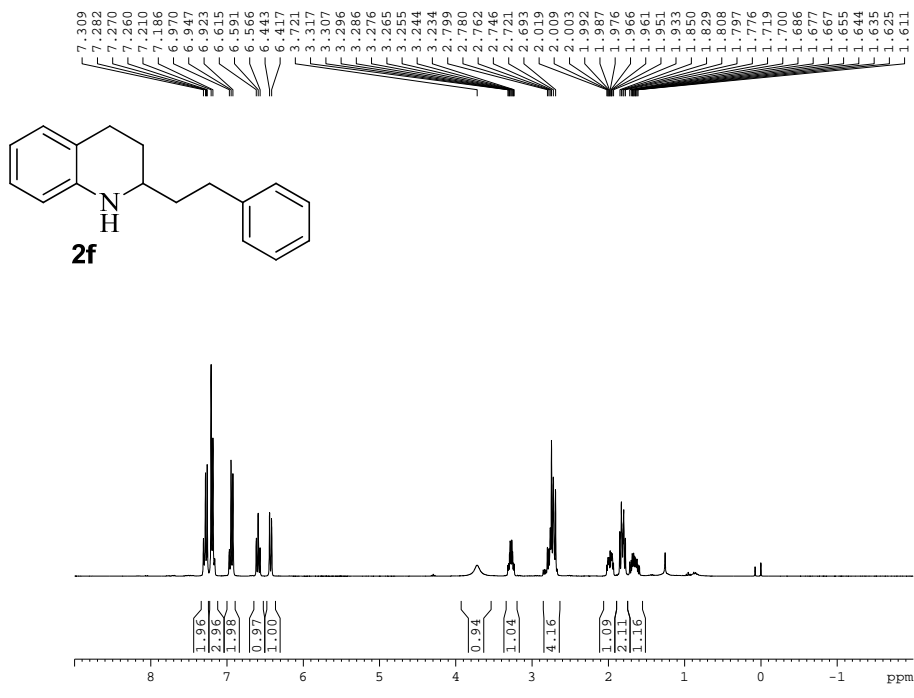

Current Data Parameters  
 NAME yzs-c-2-024-6  
 EXPNO 10  
 PROCNO 1

F2 - Acquisition Parameters  
 Date\_ 20131210  
 Time 19.46  
 INSTRUM spect  
 PROBHD 5 mm DUL 13C-1  
 PULPROG zg30  
 TD 32768  
 SOLVENT CDCl3  
 NS 16  
 DS 0  
 SWH 8992.806 Hz  
 FIDRES 0.274439 Hz  
 AQ 1.8219508 sec  
 RG 64  
 DW 55.600 usec  
 DE 6.50 usec  
 TE 296.9 K  
 D1 1.00000000 sec  
 TDO 1

==== CHANNEL f1 =====  
 NUC1 1H  
 P1 10.30 usec  
 PL1 3.00 dB  
 SFO1 300.1318534 MHz

F2 - Processing parameters  
 SI 32768  
 SF 300.1300291 MHz  
 WDW EM  
 SSB 0  
 LB 0.30 Hz  
 GB 0  
 PC 1.00

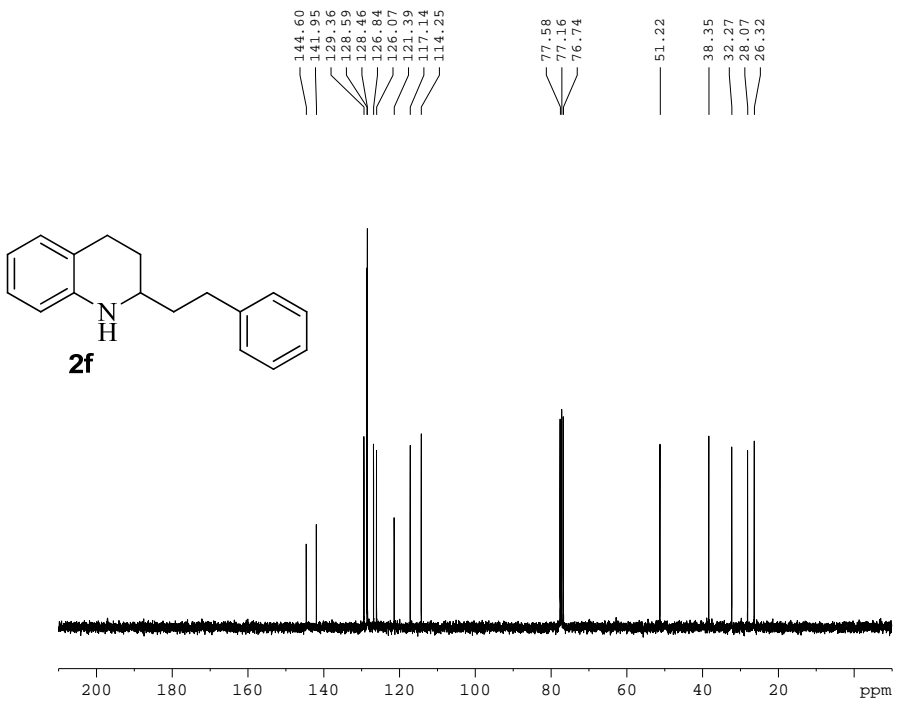

Current Data Parameters  
 NAME yzs-c-2-024-6  
 EXPNO 11  
 PROCNO 1

F2 - Acquisition Parameters  
 Date\_ 20131210  
 Time 19.54  
 INSTRUM spect  
 PROBHD 5 mm DUL 13C-1  
 PULPROG zgpg30  
 TD 65536  
 SOLVENT CDCl3  
 NS 45  
 DS 4  
 SWH 17985.611 Hz  
 FIDRES 0.274439 Hz  
 AQ 1.8219508 sec  
 RG 512  
 DW 27.800 usec  
 DE 6.50 usec  
 TE 297.2 K  
 D1 2.00000000 sec  
 D11 0.03000000 sec  
 TDO 1

==== CHANNEL f1 =====  
 NUC1 13C  
 P1 12.50 usec  
 PL1 2.00 dB  
 SFO1 75.4752953 MHz

==== CHANNEL f2 =====  
 CPDPRG2 waltz16  
 NUC2 1H  
 PCPD2 100.00 usec  
 PL2 3.00 dB  
 PL12 22.74 dB  
 PL13 23.00 dB  
 SFO2 300.1312005 MHz

F2 - Processing parameters  
 SI 32768

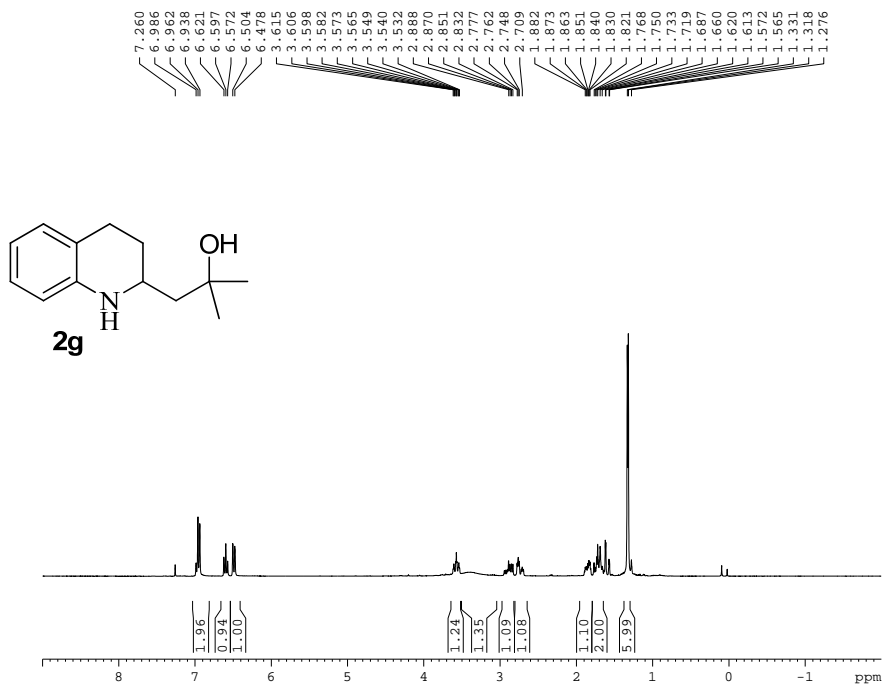

Current Data Parameters  
 NAME yzs-c-2-026-7  
 EXPNO 30  
 PROCNO 1

F2 - Acquisition Parameters  
 Date\_ 20131214  
 Time 11.02  
 INSTRUM spect  
 PROBHD 5 mm DUL 13C-1  
 PULPROG zg30  
 TD 32768  
 SOLVENT CDCl3  
 NS 16  
 DS 0  
 SWH 8992.806 Hz  
 FIDRES 0.274439 Hz  
 AQ 1.8219508 sec  
 RG 71.8  
 DW 55.600 usec  
 DE 6.50 usec  
 TE 295.2 K  
 D1 1.00000000 sec  
 TD0 1

==== CHANNEL f1 =====  
 NUC1 1H  
 P1 10.30 usec  
 PL1 3.00 dB  
 SFO1 300.1318534 MHz

F2 - Processing parameters  
 SI 32768  
 SF 300.1300067 MHz  
 WDW EM  
 SSB 0  
 LB 0.30 Hz  
 GB 0  
 PC 1.00

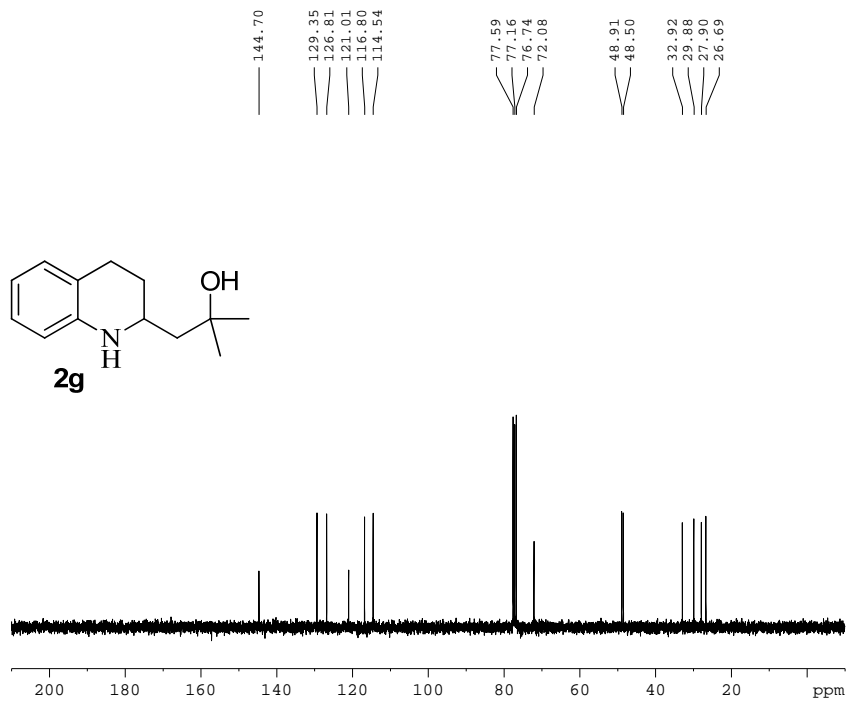

Current Data Parameters  
 NAME yzs-c-2-026-7  
 EXPNO 31  
 PROCNO 1

F2 - Acquisition Parameters  
 Date\_ 20131214  
 Time 11.05  
 INSTRUM spect  
 PROBHD 5 mm DUL 13C-1  
 PULPROG zgpg30  
 TD 65536  
 SOLVENT CDCl3  
 NS 40  
 DS 4  
 SWH 17985.611 Hz  
 FIDRES 0.274439 Hz  
 AQ 1.8219508 sec  
 RG 362  
 DW 27.800 usec  
 DE 6.50 usec  
 TE 295.6 K  
 D1 2.00000000 sec  
 D11 0.03000000 sec  
 TD0 1

==== CHANNEL f1 =====  
 NUC1 13C  
 P1 12.50 usec  
 PL1 2.00 dB  
 SFO1 75.4752953 MHz

==== CHANNEL f2 =====  
 CPDPRG2 waltz16  
 NUC2 1H  
 PCPD2 100.00 usec  
 PL2 3.00 dB  
 PL12 22.74 dB  
 PL13 23.00 dB  
 SFO2 300.1312005 MHz

F2 - Processing parameters  
 SI 32768

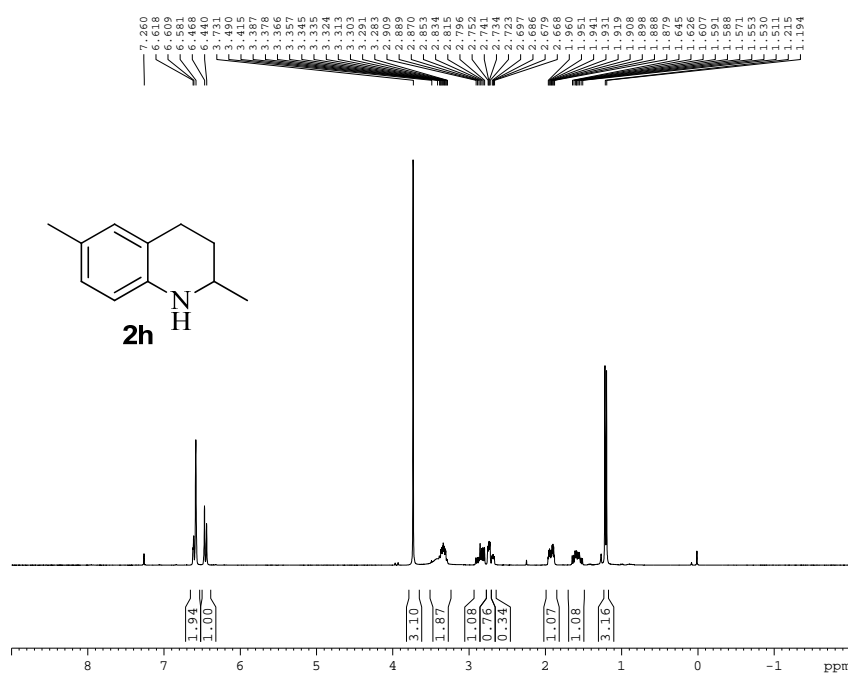

Current Data Parameters  
 NAME yzs-c-2-026-3  
 EXPNO 10  
 PROCNO 1

F2 - Acquisition Parameters  
 Date\_ 20131211  
 Time 22.04  
 INSTRUM spect  
 PROBHD 5 mm DUL 13C-1  
 PULPROG zg30  
 TD 32768  
 SOLVENT CDCl3  
 NS 16  
 DS 0  
 SWH 8992.806 Hz  
 FIDRES 0.274439 Hz  
 AQ 1.8219508 sec  
 RG 181  
 DW 55.600 usec  
 DE 6.50 usec  
 TE 296.8 K  
 D1 1.00000000 sec  
 TD0 1

----- CHANNEL f1 -----  
 NUC1 1H  
 P1 10.30 usec  
 PL1 3.00 dB  
 SF01 300.1318534 MHz

F2 - Processing parameters  
 SI 32768  
 SF 300.1300067 MHz  
 WDW EM  
 SSB 0  
 LB 0.30 Hz  
 GB 0  
 PC 1.00

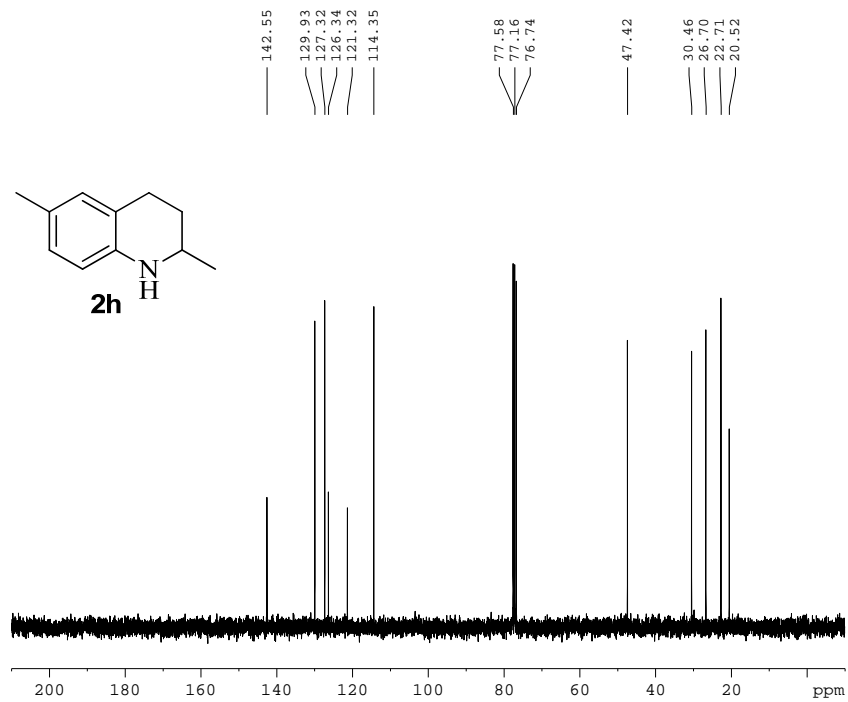

Current Data Parameters  
 NAME YZS-C-2-026-1  
 EXPNO 11  
 PROCNO 1

F2 - Acquisition Parameters  
 Date\_ 20131211  
 Time 21.34  
 INSTRUM spect  
 PROBHD 5 mm DUL 13C-1  
 PULPROG zgpg30  
 TD 65536  
 SOLVENT CDCl3  
 NS 41  
 DS 4  
 SWH 17985.611 Hz  
 FIDRES 0.274439 Hz  
 AQ 1.8219508 sec  
 RG 512  
 DW 27.800 usec  
 DE 6.50 usec  
 TE 296.8 K  
 D1 2.00000000 sec  
 D11 0.03000000 sec  
 TD0 1

===== CHANNEL f1 =====  
 NUC1 13C  
 P1 12.50 usec  
 PL1 2.00 dB  
 SF01 75.4752953 MHz

===== CHANNEL f2 =====  
 CPDPRG2 waltz16  
 NUC2 1H  
 PCPD2 100.00 usec  
 PL2 3.00 dB  
 PL12 22.74 dB  
 PL13 23.00 dB  
 SF02 300.1312005 MHz

F2 - Processing parameters  
 SI 32768

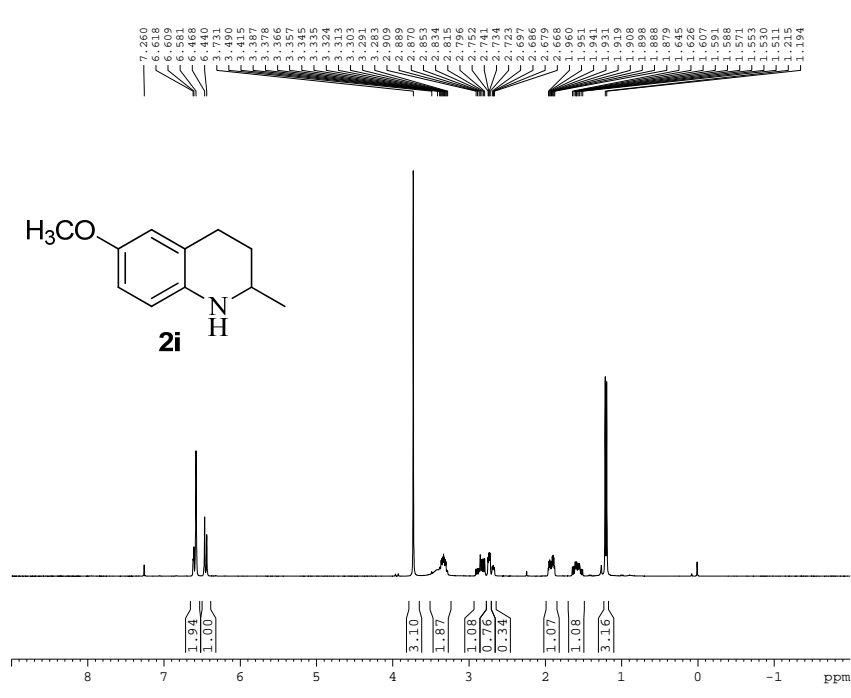

Current Data Parameters  
 NAME yzs-c-2-026-3  
 EXPNO 10  
 PROCNO 1

F2 - Acquisition Parameters  
 Date\_ 20131211  
 Time 22.04  
 INSTRUM spect  
 PROBHD 5 mm DUL 13C-1  
 PULPROG zg30  
 TD 32768  
 SOLVENT CDCl3  
 NS 16  
 DS 0  
 SWH 8992.806 Hz  
 FIDRES 0.274439 Hz  
 AQ 1.8219508 sec  
 RG 181  
 DW 55.600 usec  
 DE 6.50 usec  
 TE 296.8 K  
 D1 1.0000000 sec  
 TDO 1

==== CHANNEL f1 =====  
 NUC1 1H  
 P1 10.30 usec  
 PL1 3.00 dB  
 SFO1 300.1318534 MHz

F2 - Processing parameters  
 SI 32768  
 SF 300.1300067 MHz  
 WDW EM  
 SSB 0  
 LB 0.30 Hz  
 GB 0  
 PC 1.00

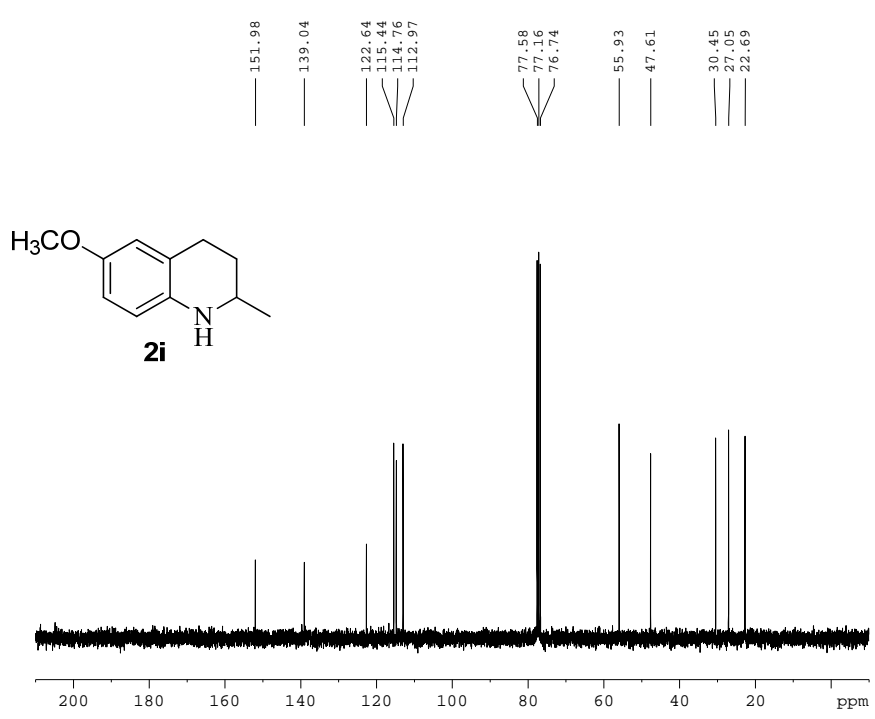

Current Data Parameters  
 NAME yzs-c-2-026-3  
 EXPNO 11  
 PROCNO 1

F2 - Acquisition Parameters  
 Date\_ 20131211  
 Time 22.07  
 INSTRUM spect  
 PROBHD 5 mm DUL 13C-1  
 PULPROG zgpg30  
 TD 65536  
 SOLVENT CDCl3  
 NS 82  
 DS 4  
 SWH 17985.611 Hz  
 FIDRES 0.274439 Hz  
 AQ 1.8219508 sec  
 RG 512  
 DW 27.800 usec  
 DE 6.50 usec  
 TE 296.9 K  
 D1 2.0000000 sec  
 D11 0.03000000 sec  
 TDO 1

==== CHANNEL f1 =====  
 NUC1 13C  
 P1 12.50 usec  
 PL1 2.00 dB  
 SFO1 75.4752953 MHz

==== CHANNEL f2 =====  
 CPDPRG2 waltz16  
 NUC2 1H  
 PCPD2 100.00 usec  
 PL2 3.00 dB  
 PL12 22.74 dB  
 PL13 23.00 dB  
 SFO2 300.1312005 MHz

F2 - Processing parameters  
 SI 32768

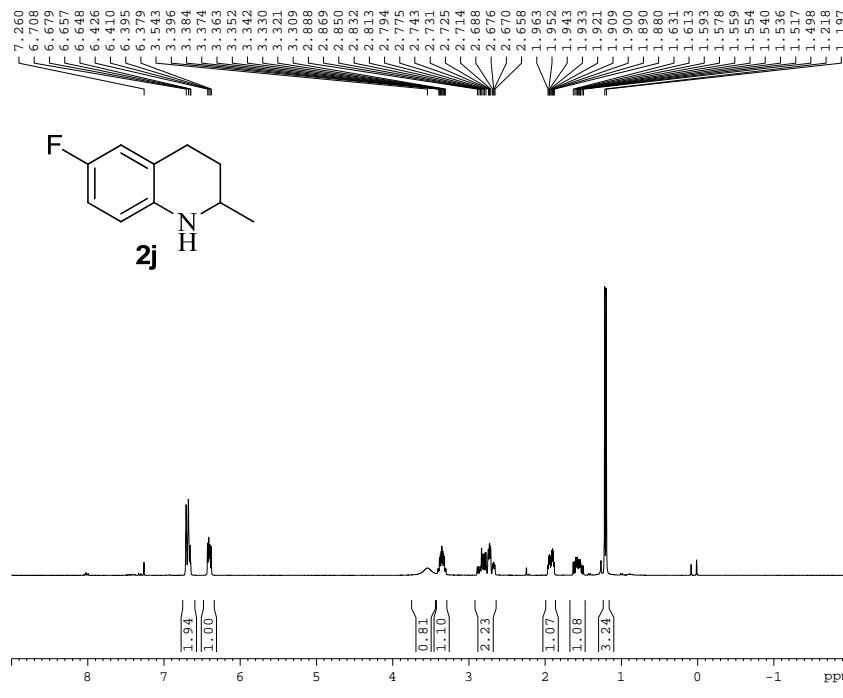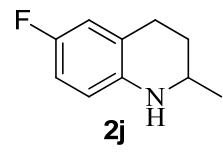

Current Data Parameters  
 NAME YZS-C-2-026-2  
 EXPNO 10  
 PROCNO 1

F2 - Acquisition Parameters  
 Date\_ 20131211  
 Time 21.41  
 INSTRUM spect  
 PROBHD 5 mm DUL 13C-1  
 PULPROG zg30  
 TD 32768  
 SOLVENT CDCl3  
 NS 16  
 DS 0  
 SWH 8992.806 Hz  
 FIDRES 0.274439 Hz  
 AQ 1.8219508 sec  
 RG 181  
 DW 55.600 usec  
 DE 6.50 usec  
 TE 296.8 K  
 D1 1.00000000 sec  
 TDO 1

==== CHANNEL f1 =====  
 NUC1 1H  
 P1 10.30 usec  
 PL1 3.00 dB  
 SFO1 300.1318534 MHz

F2 - Processing parameters  
 SI 32768  
 SF 300.1300067 MHz  
 WDW EM  
 SSB 0  
 LB 0.30 Hz  
 GB 0  
 PC 1.00

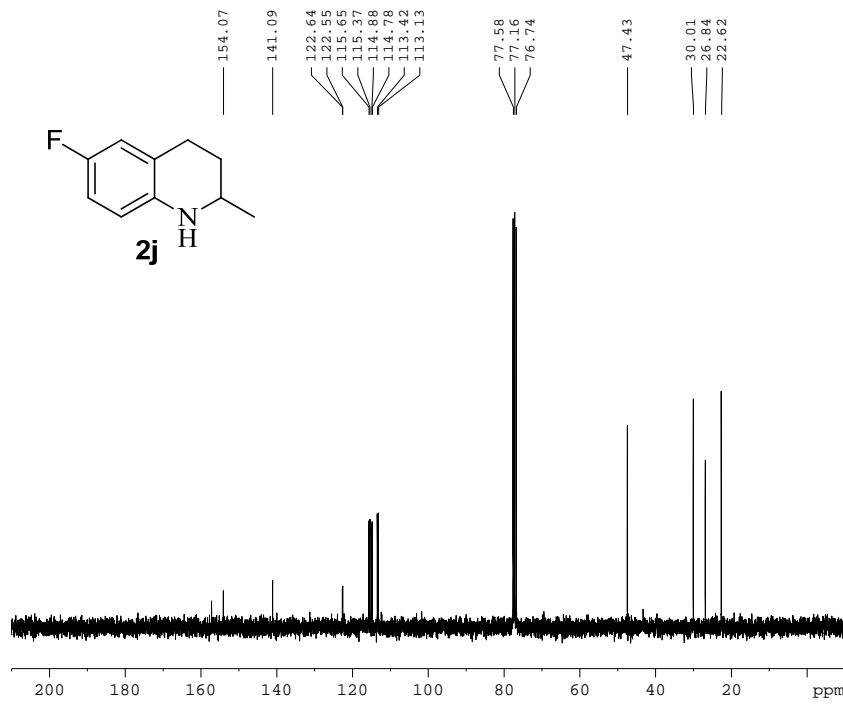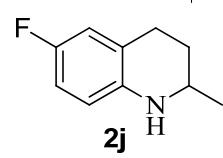

Current Data Parameters  
 NAME YZS-C-2-026-2  
 EXPNO 21  
 PROCNO 1

F2 - Acquisition Parameters  
 Date\_ 20131211  
 Time 21.55  
 INSTRUM spect  
 PROBHD 5 mm DUL 13C-1  
 PULPROG zgpg30  
 TD 65536  
 SOLVENT CDCl3  
 NS 92  
 DS 4  
 SWH 17985.611 Hz  
 FIDRES 0.274439 Hz  
 AQ 1.8219508 sec  
 RG 1149.4  
 DW 27.800 usec  
 DE 6.50 usec  
 TE 297.1 K  
 D1 2.00000000 sec  
 D11 0.03000000 sec  
 TDO 1

==== CHANNEL f1 =====  
 NUC1 13C  
 P1 12.50 usec  
 PL1 2.00 dB  
 SFO1 75.4752953 MHz

==== CHANNEL f2 =====  
 CPDPRG2 waltz16  
 NUC2 1H  
 PCPD2 100.00 usec  
 PL2 3.00 dB  
 PL12 22.74 dB  
 PL13 23.00 dB  
 SFO2 300.1312005 MHz

F2 - Processing parameters  
 SI 32768

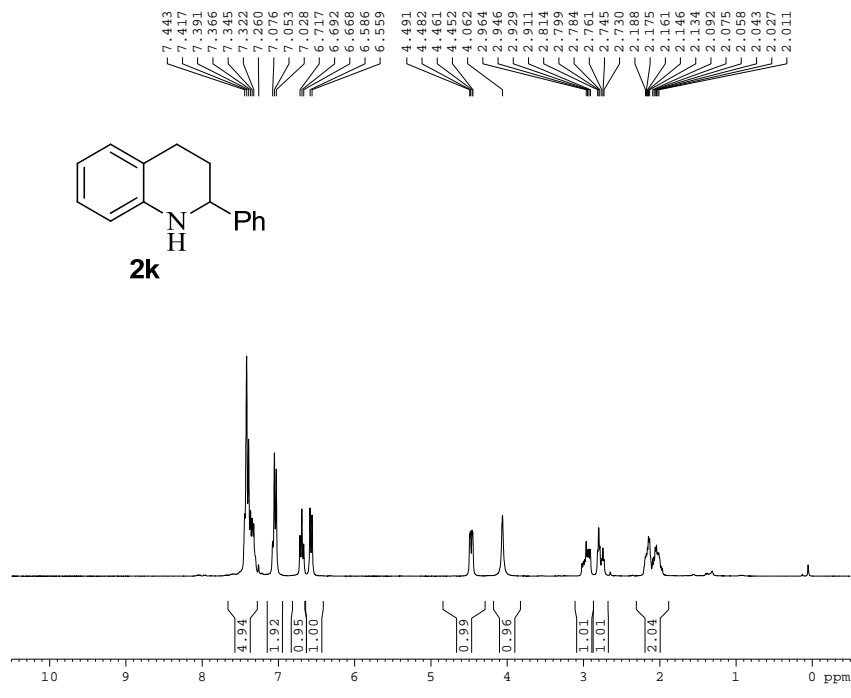

Current Data Parameters  
 NAME yzs-c-2-ph-r  
 EXPNO 10  
 PROCNO 1

F2 - Acquisition Parameters  
 Date\_ 20140121  
 Time 14.35  
 INSTRUM spect  
 PROBHD 5 mm DUL 13C-1  
 PULPROG zg30  
 TD 32768  
 SOLVENT CDCl3  
 NS 16  
 DS 0  
 SWH 8992.806 Hz  
 FIDRES 0.274439 Hz  
 AQ 1.8219508 sec  
 RG 128  
 DW 55.600 usec  
 DE 6.50 usec  
 TE 295.9 K  
 D1 1.00000000 sec  
 TDO 1

==== CHANNEL f1 =====  
 NUC1 1H  
 P1 10.30 usec  
 PL1 3.00 dB  
 SFO1 300.1318534 MHz

F2 - Processing parameters  
 SI 32768  
 SF 300.1300070 MHz  
 WDW EM  
 SSB 0  
 LB 0.30 Hz  
 GB 0  
 PC 1.00

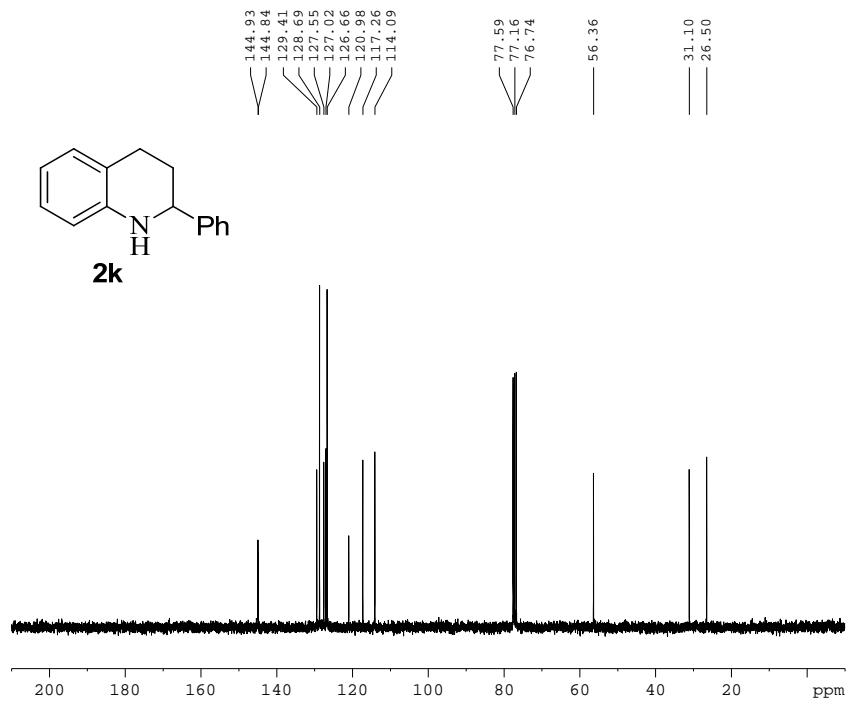

Current Data Parameters  
 NAME yzs-c-2-ph-r  
 EXPNO 11  
 PROCNO 1

F2 - Acquisition Parameters  
 Date\_ 20140121  
 Time 14.45  
 INSTRUM spect  
 PROBHD 5 mm DUL 13C-1  
 PULPROG zgpg30  
 TD 65536  
 SOLVENT CDCl3  
 NS 103  
 DS 4  
 SWH 17985.611 Hz  
 FIDRES 0.274439 Hz  
 AQ 1.8219508 sec  
 RG 2580.3  
 DW 27.800 usec  
 DE 6.50 usec  
 TE 296.5 K  
 D1 2.00000000 sec  
 D11 0.03000000 sec  
 TDO 1

==== CHANNEL f1 =====  
 NUC1 13C  
 P1 12.50 usec  
 PL1 2.00 dB  
 SFO1 75.4752953 MHz

==== CHANNEL f2 =====  
 CPDPRG2 waltz16  
 NUC2 1H  
 PCPD2 100.00 usec  
 PL2 3.00 dB  
 PL12 22.74 dB  
 PL13 23.00 dB  
 SFO2 300.1312005 MHz

F2 - Processing parameters  
 SI 32768



## 8. HPLC spectra of products catalyzed by (S,S)-6

### 7.1 HPLC spectra of 2a catalyzed by (S,S)-6

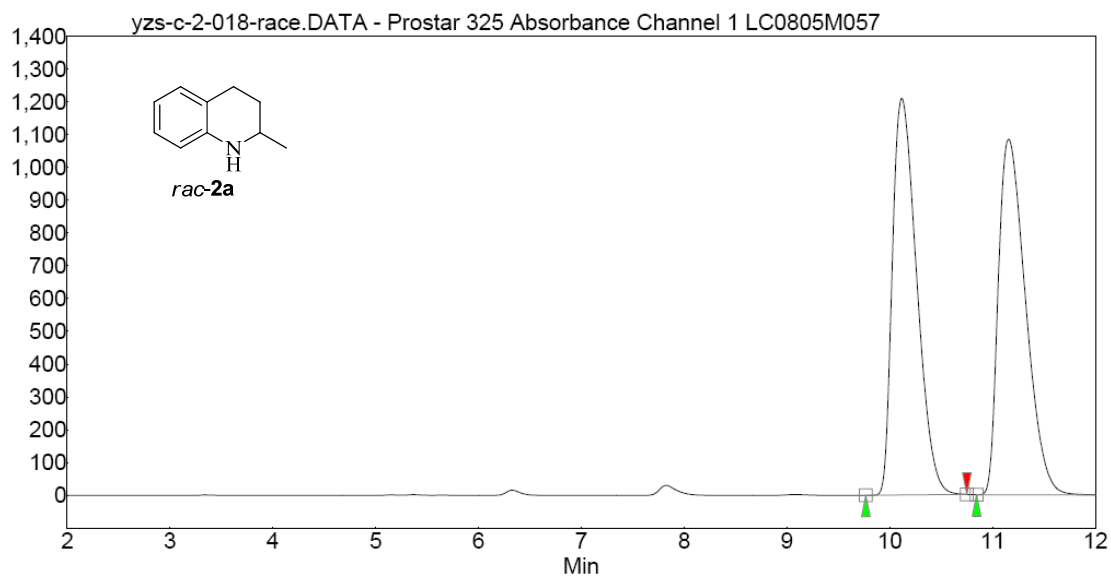

| Index | 文件名 | 时间 [Min] | 数量 [% 面积] | 高度 [mAU] | Area [mAU.Min] | Area % [%] |
|-------|-----|----------|-----------|----------|----------------|------------|
| 1     | 未知  | 10.11    | 49.84     | 1208.8   | 331.2          | 49.836     |
| 2     | 未知  | 11.15    | 50.16     | 1083.9   | 333.4          | 50.164     |
| Total |     |          | 100.00    | 2292.7   | 664.6          | 100.000    |

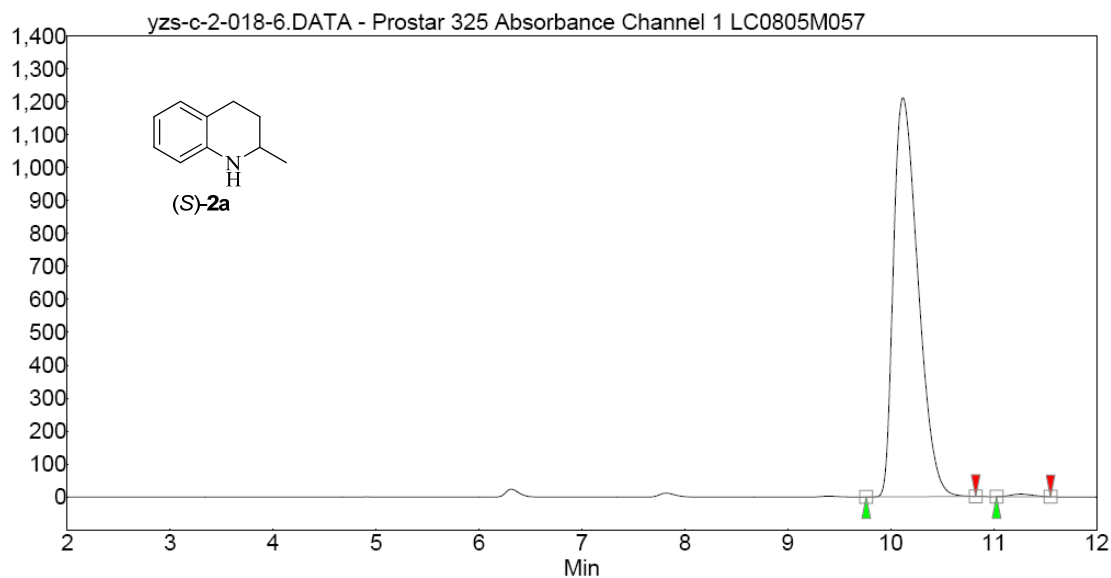

| Index | 文件名 | 时间 [Min] | 数量 [% 面积] | 高度 [mAU] | Area [mAU.Min] | Area % [%] |
|-------|-----|----------|-----------|----------|----------------|------------|
| 1     | 未知  | 10.12    | 99.42     | 1211.7   | 334.5          | 99.421     |
| 2     | 未知  | 11.26    | 0.58      | 7.7      | 1.9            | 0.579      |
| Total |     |          | 100.00    | 1219.4   | 336.5          | 100.000    |

## HPLC spectra of 2b catalyzed by (S,S)-6

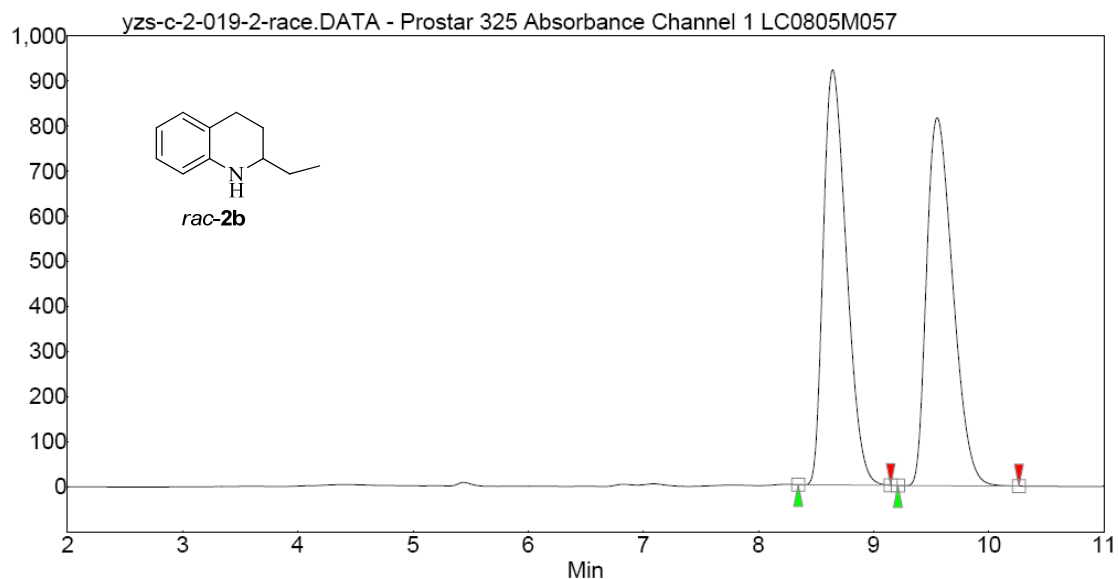

| Index | 文件名 | 时间 [Min] | 数量 [% 面积] | 高度 [mAU] | Area [mAU.Min] | Area % [%] |
|-------|-----|----------|-----------|----------|----------------|------------|
| 1     | 未知  | 8.65     | 49.84     | 920.1    | 214.2          | 49.836     |
| 2     | 未知  | 9.55     | 50.16     | 816.0    | 215.7          | 50.164     |
| Total |     |          | 100.00    | 1736.0   | 429.9          | 100.000    |

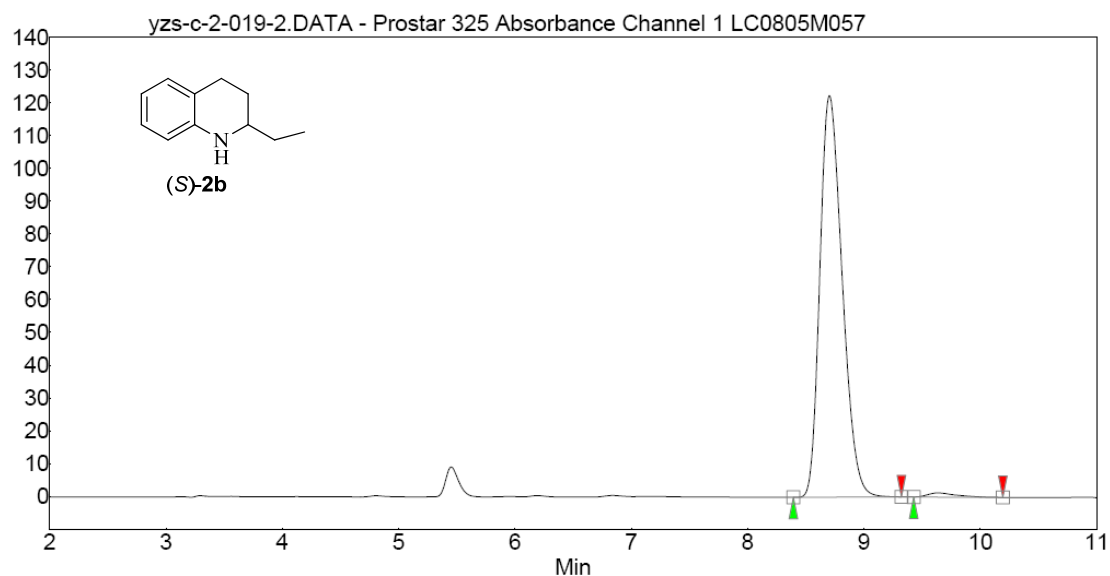

| Index | 文件名 | 时间 [Min] | 数量 [% 面积] | 高度 [mAU] | Area [mAU.Min] | Area % [%] |
|-------|-----|----------|-----------|----------|----------------|------------|
| 1     | 未知  | 8.70     | 98.68     | 122.3    | 27.2           | 98.685     |
| 2     | 未知  | 9.64     | 1.32      | 1.3      | 0.4            | 1.315      |
| Total |     |          | 100.00    | 123.6    | 27.6           | 100.000    |

## HPLC spectra of 2e catalyzed by (S,S)-6

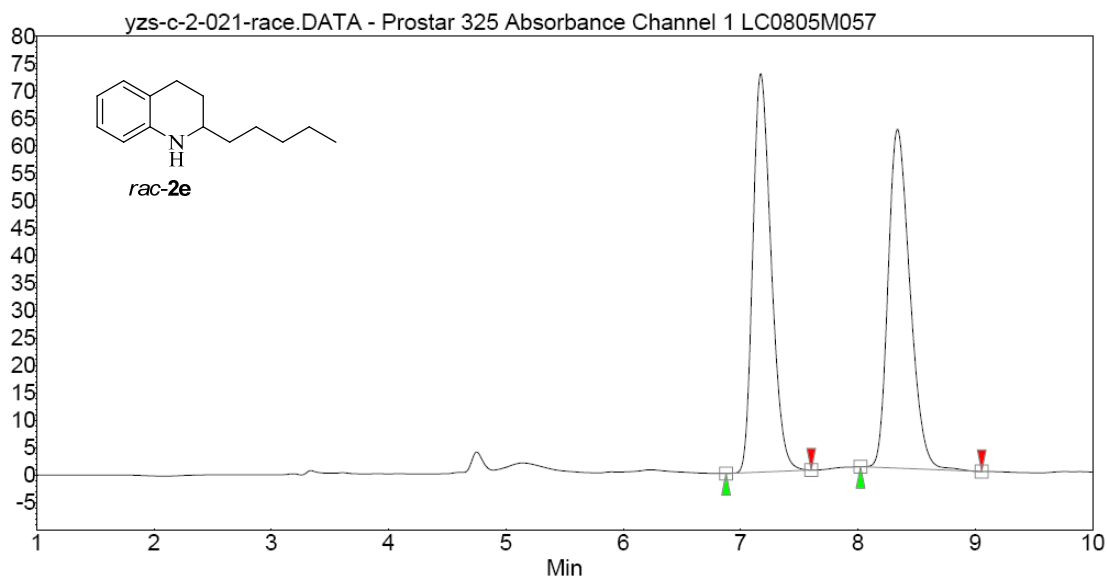

| Index | 文件名 | 时间 [Min] | 数量 [% 面积] | 高度 [mAU] | Area [mAU.Min] | Area % [%] |
|-------|-----|----------|-----------|----------|----------------|------------|
| 1     | 未知  | 7.17     | 49.66     | 72.6     | 13.2           | 49.662     |
| 2     | 未知  | 8.33     | 50.34     | 61.7     | 13.3           | 50.338     |
|       |     |          |           |          |                |            |
| Total |     |          | 100.00    | 134.3    | 26.5           | 100.000    |

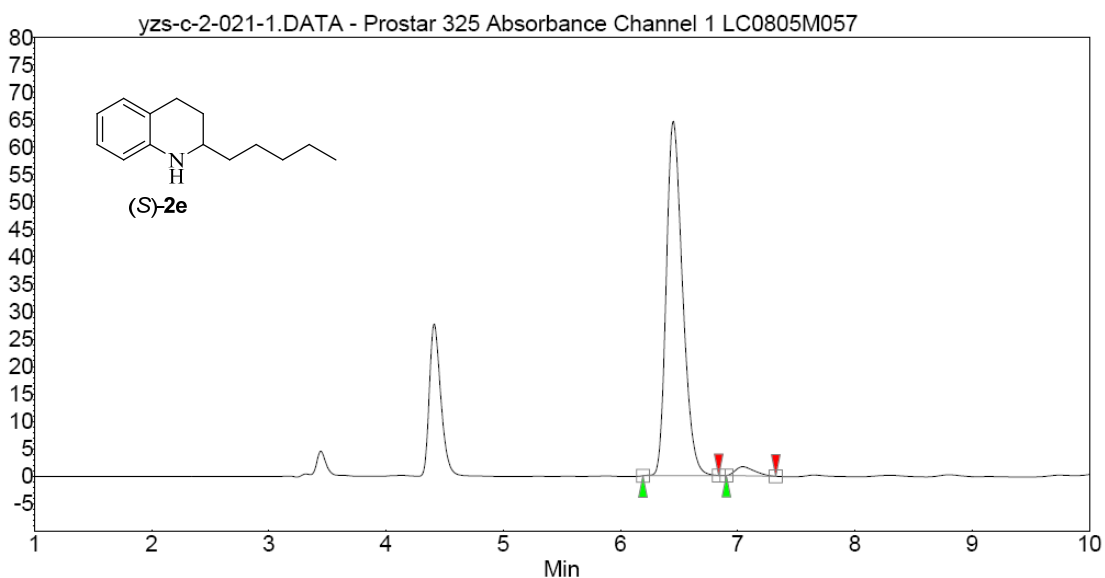

| Index | 文件名 | 时间 [Min] | 数量 [% 面积] | 高度 [mAU] | Area [mAU.Min] | Area % [%] |
|-------|-----|----------|-----------|----------|----------------|------------|
| 1     | 未知  | 6.45     | 97.11     | 64.6     | 10.4           | 97.109     |
| 2     | 未知  | 7.05     | 2.89      | 1.7      | 0.3            | 2.891      |
|       |     |          |           |          |                |            |
| Total |     |          | 100.00    | 66.2     | 10.7           | 100.000    |

## HPLC spectra of 2h catalyzed by (S,S)-6

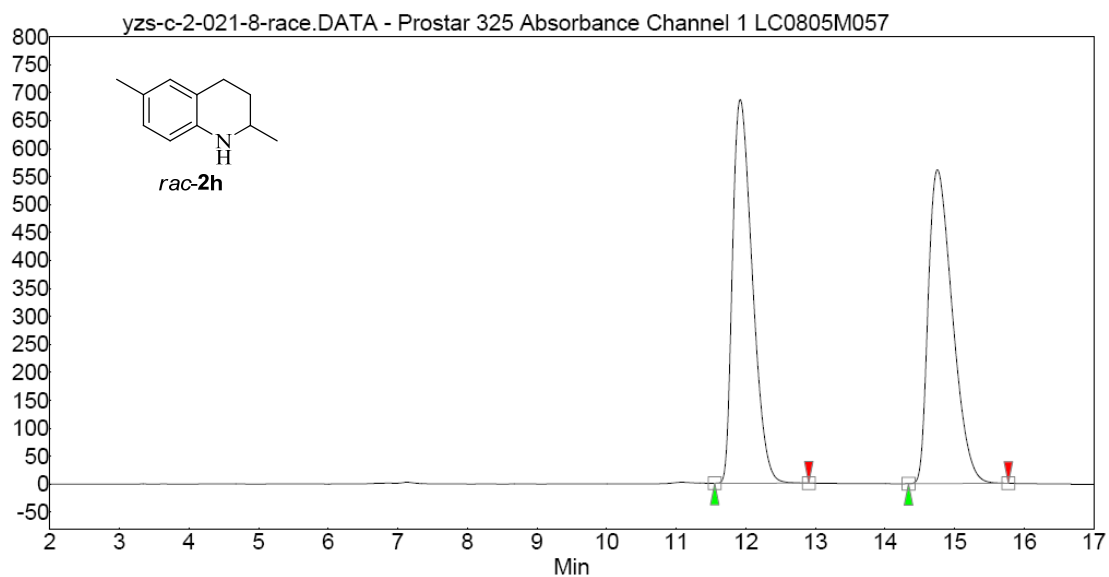

| Index | 文件名 | 时间 [Min] | 数量 [% 面积] | 高度 [mAU] | Area [mAU.Min] | Area % [%] |
|-------|-----|----------|-----------|----------|----------------|------------|
| 1     | 未知  | 12.12    | 99.32     | 126.3    | 38.7           | 99.325     |
| 2     | 未知  | 15.02    | 0.68      | 0.7      | 0.3            | 0.675      |
| Total |     |          | 100.00    | 127.1    | 38.9           | 100.000    |

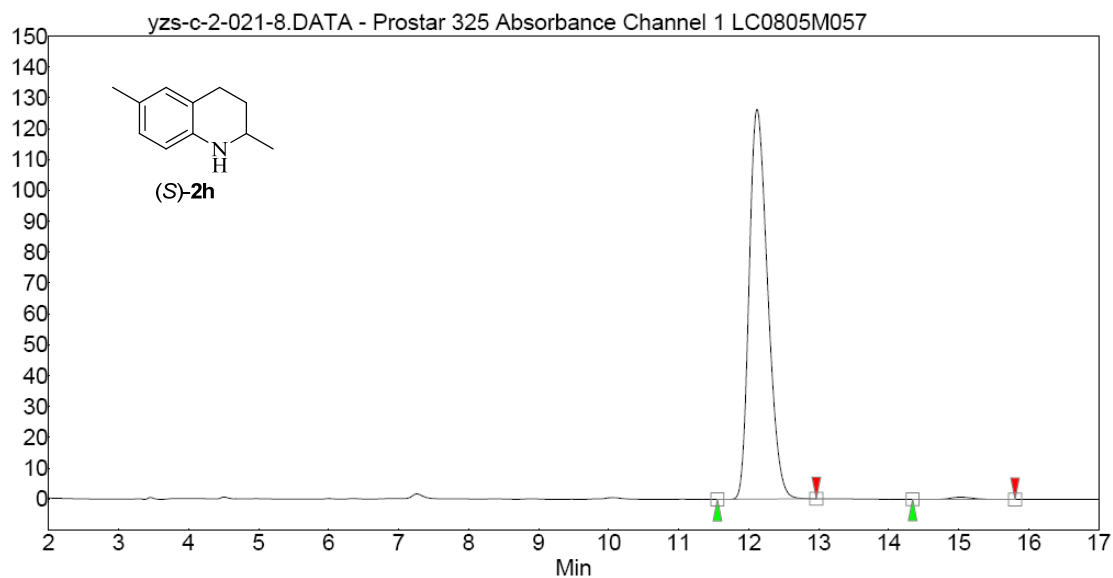

| Index | 文件名 | 时间 [Min] | 数量 [% 面积] | 高度 [mAU] | Area [mAU.Min] | Area % [%] |
|-------|-----|----------|-----------|----------|----------------|------------|
| 1     | 未知  | 12.12    | 99.32     | 126.3    | 38.7           | 99.325     |
| 2     | 未知  | 15.02    | 0.68      | 0.7      | 0.3            | 0.675      |
| Total |     |          | 100.00    | 127.1    | 38.9           | 100.000    |

## HPLC spectra of 2i catalyzed by (S,S)-6

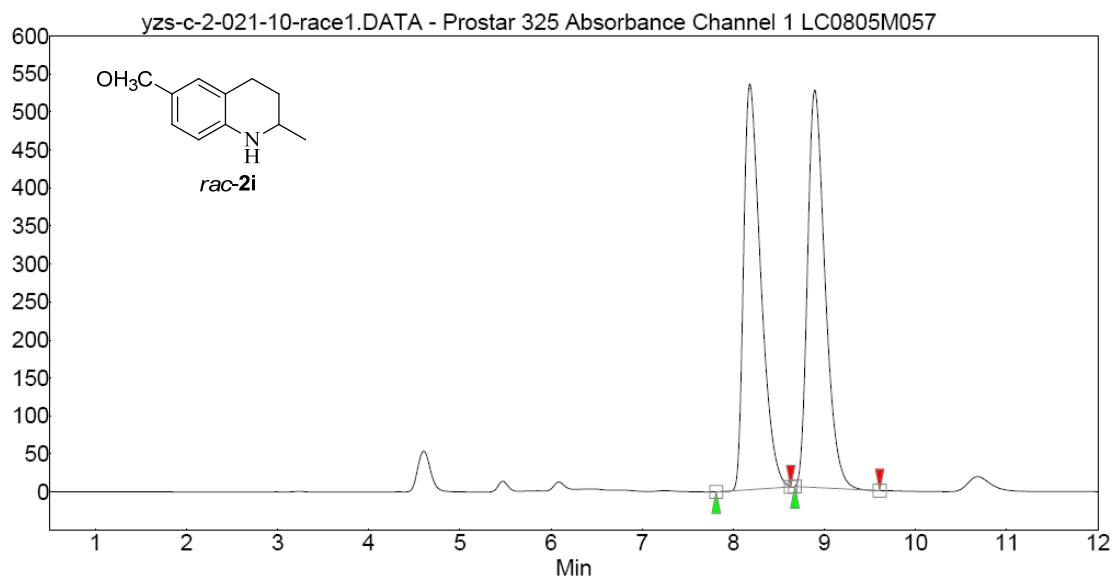

| Index | 文件名 | 时间 [Min] | 数量 [% 面积] | 高度 [mAU] | Area [mAU.Min] | Area % [%] |
|-------|-----|----------|-----------|----------|----------------|------------|
| 1     | 未知  | 8.18     | 49.97     | 533.8    | 116.5          | 49.965     |
| 2     | 未知  | 8.89     | 50.03     | 523.1    | 116.6          | 50.035     |
|       |     |          |           |          |                |            |
| Total |     |          | 100.00    | 1056.9   | 233.1          | 100.000    |

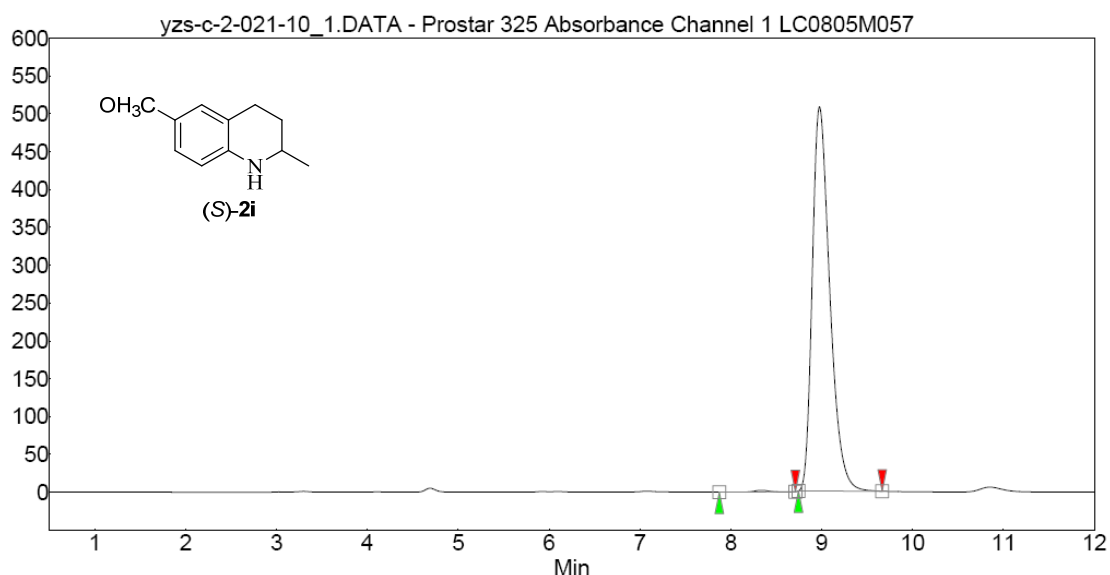

| Index | 文件名 | 时间 [Min] | 数量 [% 面积] | 高度 [mAU] | Area [mAU.Min] | Area % [%] |
|-------|-----|----------|-----------|----------|----------------|------------|
| 1     | 未知  | 8.33     | 0.31      | 2.3      | 0.4            | 0.311      |
| 2     | 未知  | 8.97     | 99.69     | 507.8    | 113.5          | 99.689     |
|       |     |          |           |          |                |            |
| Total |     |          | 100.00    | 510.1    | 113.8          | 100.000    |

## HPLC spectra of 2j catalyzed by (S,S)-6

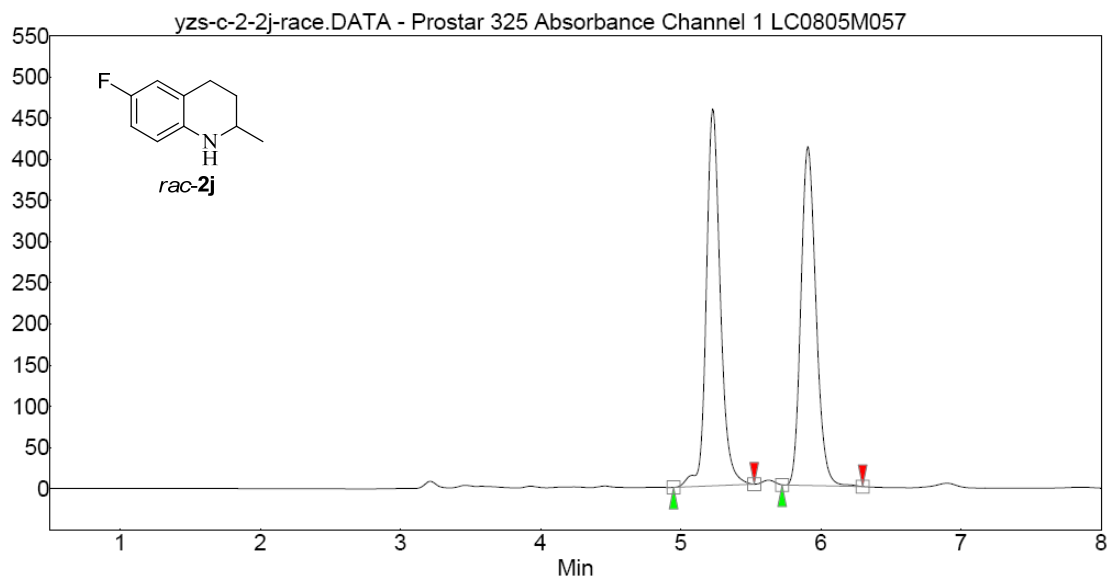

| Index | 文件名 | 时间 [Min] | 数量 [% 面积] | 高度 [mAU] | Area [mAU.Min] | Area % [%] |
|-------|-----|----------|-----------|----------|----------------|------------|
| 1     | 未知  | 5.23     | 50.85     | 457.6    | 53.1           | 50.853     |
| 2     | 未知  | 5.91     | 49.15     | 411.7    | 51.3           | 49.147     |
| Total |     |          | 100.00    | 869.2    | 104.4          | 100.000    |

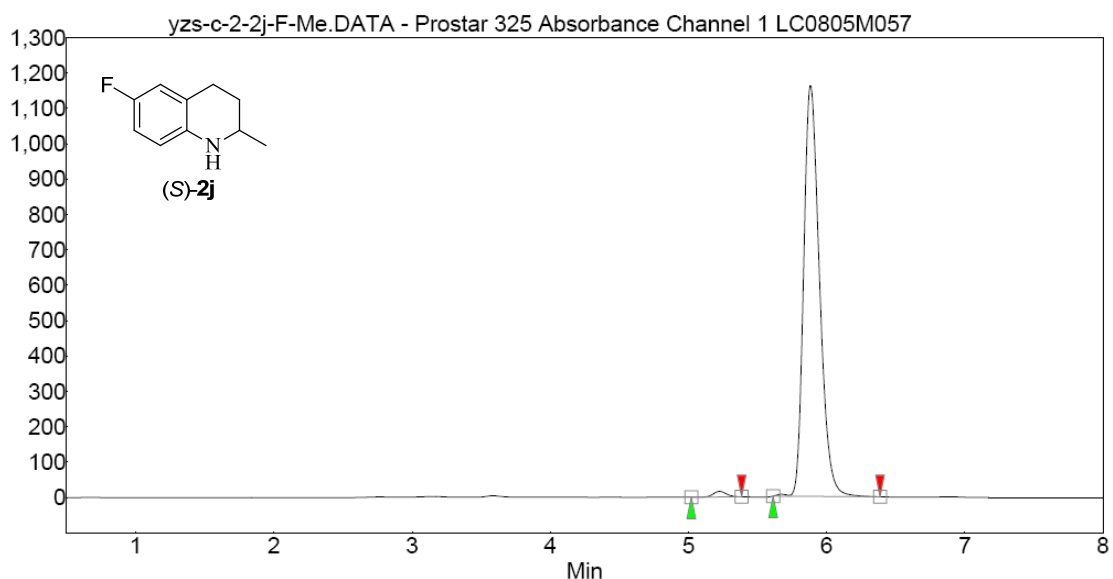

| Index | 文件名 | 时间 [Min] | 数量 [% 面积] | 高度 [mAU] | Area [mAU.Min] | Area % [%] |
|-------|-----|----------|-----------|----------|----------------|------------|
| 1     | 未知  | 5.23     | 1.13      | 16.0     | 1.8            | 1.125      |
| 2     | 未知  | 5.88     | 98.87     | 1161.0   | 154.8          | 98.875     |
| Total |     |          | 100.00    | 1177.0   | 156.6          | 100.000    |

## 8.2 HPLC spectra of products catalyzed by (R,R)-3

### HPLC spectra of 2b catalyzed by (R,R)-3

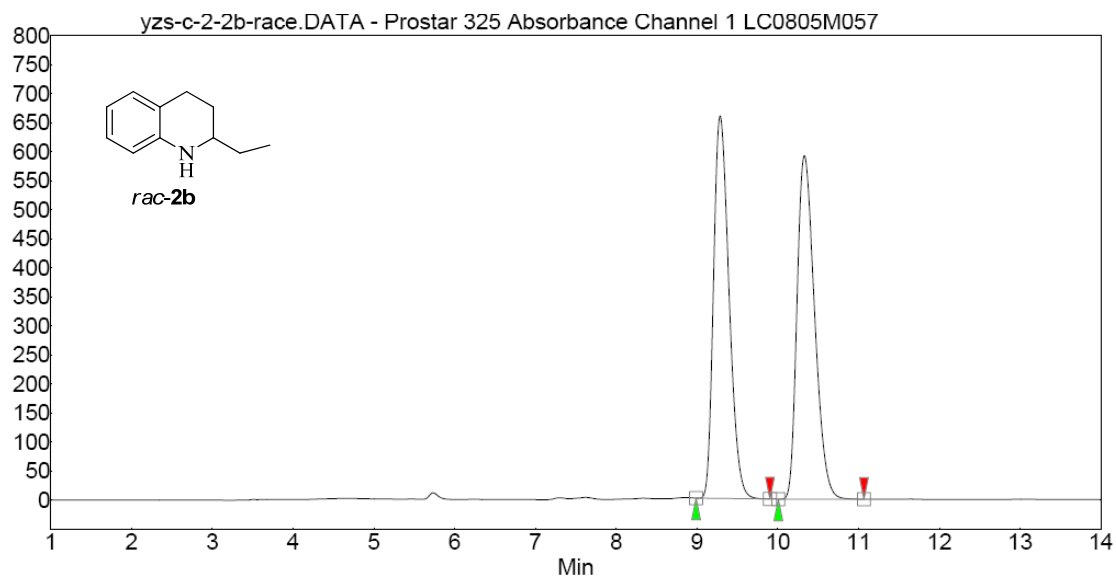

| Index | 文件名 | 时间 [Min] | 数量 [% 面积] | 高度 [mAU] | Area [mAU.Min] | Area % [%] |
|-------|-----|----------|-----------|----------|----------------|------------|
| 1     | 未知  | 9.29     | 49.50     | 658.5    | 146.1          | 49.501     |
| 2     | 未知  | 10.33    | 50.50     | 591.5    | 149.0          | 50.499     |
|       |     |          |           |          |                |            |
| Total |     |          | 100.00    | 1249.9   | 295.1          | 100.000    |

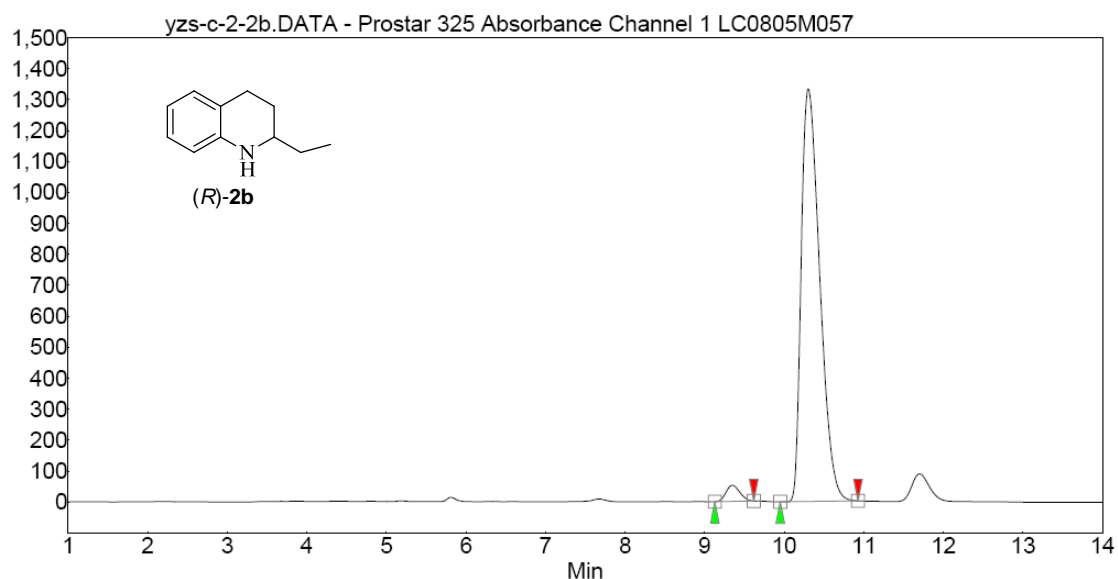

| Index | 文件名 | 时间 [Min] | 数量 [% 面积] | 高度 [mAU] | Area [mAU.Min] | Area % [%] |
|-------|-----|----------|-----------|----------|----------------|------------|
| 1     | 未知  | 9.35     | 2.84      | 52.2     | 10.5           | 2.839      |
| 2     | 未知  | 10.30    | 97.16     | 1332.9   | 359.1          | 97.161     |
|       |     |          |           |          |                |            |
| Total |     |          | 100.00    | 1385.1   | 369.6          | 100.000    |

## HPLC spectra of 2c catalyzed by (R,R)-3

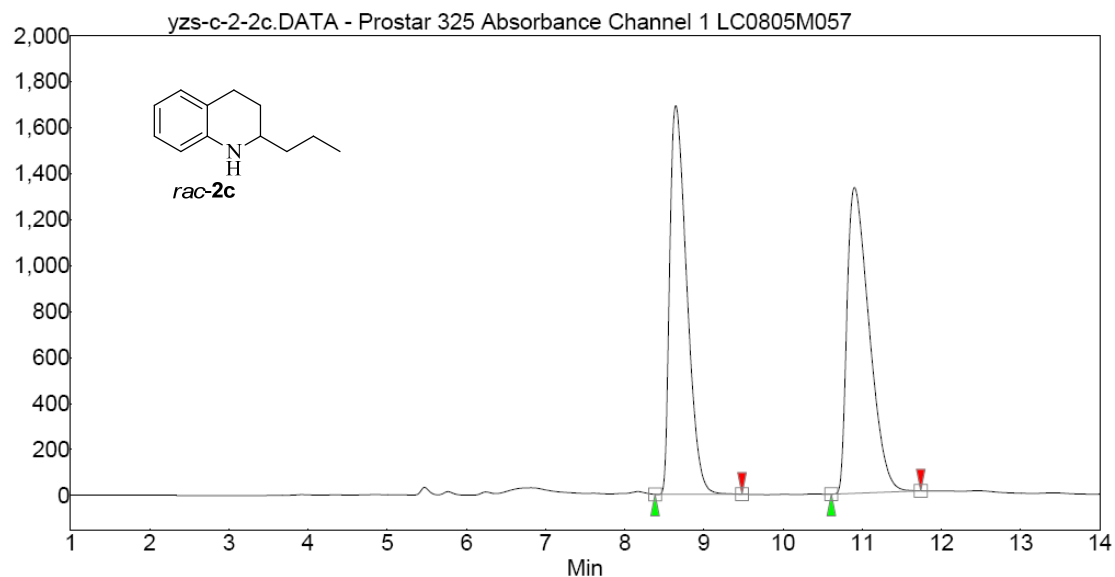

| Index | 文件名 | 时间 [Min] | 数量 [% 面积] | 高度 [mAU] | Area [mAU.Min] | Area % [%] |
|-------|-----|----------|-----------|----------|----------------|------------|
| 1     | 未知  | 8.65     | 49.42     | 1690.7   | 421.4          | 49.420     |
| 2     | 未知  | 10.90    | 50.58     | 1330.2   | 431.3          | 50.580     |
| Total |     |          | 100.00    | 3020.8   | 852.8          | 100.000    |

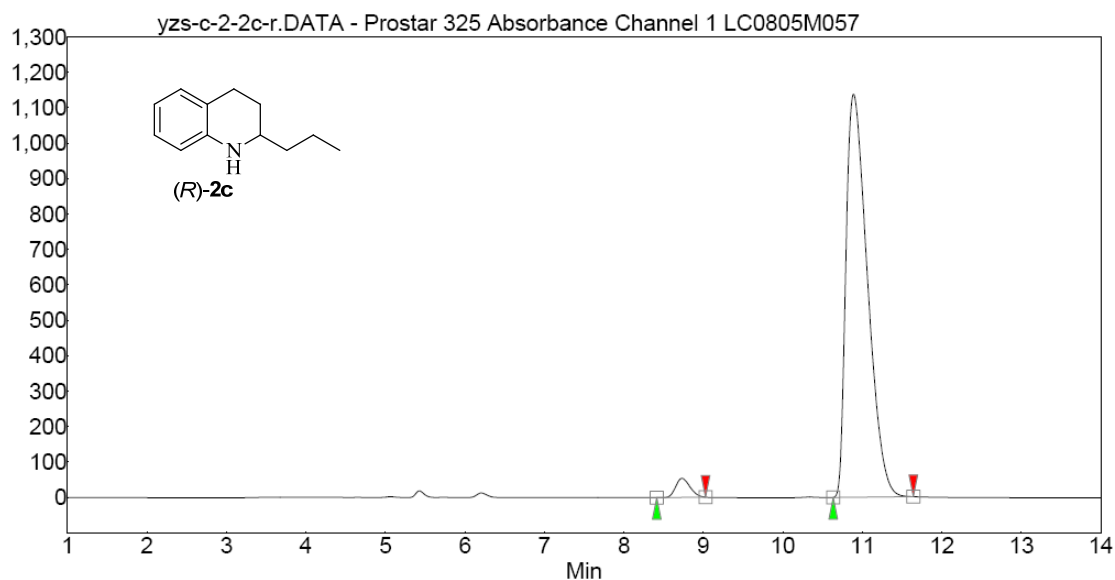

| Index | 文件名 | 时间 [Min] | 数量 [% 面积] | 高度 [mAU] | Area [mAU.Min] | Area % [%] |
|-------|-----|----------|-----------|----------|----------------|------------|
| 1     | 未知  | 8.73     | 3.05      | 53.8     | 11.2           | 3.050      |
| 2     | 未知  | 10.89    | 96.95     | 1137.9   | 356.0          | 96.950     |
| Total |     |          | 100.00    | 1191.7   | 367.2          | 100.000    |



## HPLC spectra of 2d catalyzed by (R,R)-3

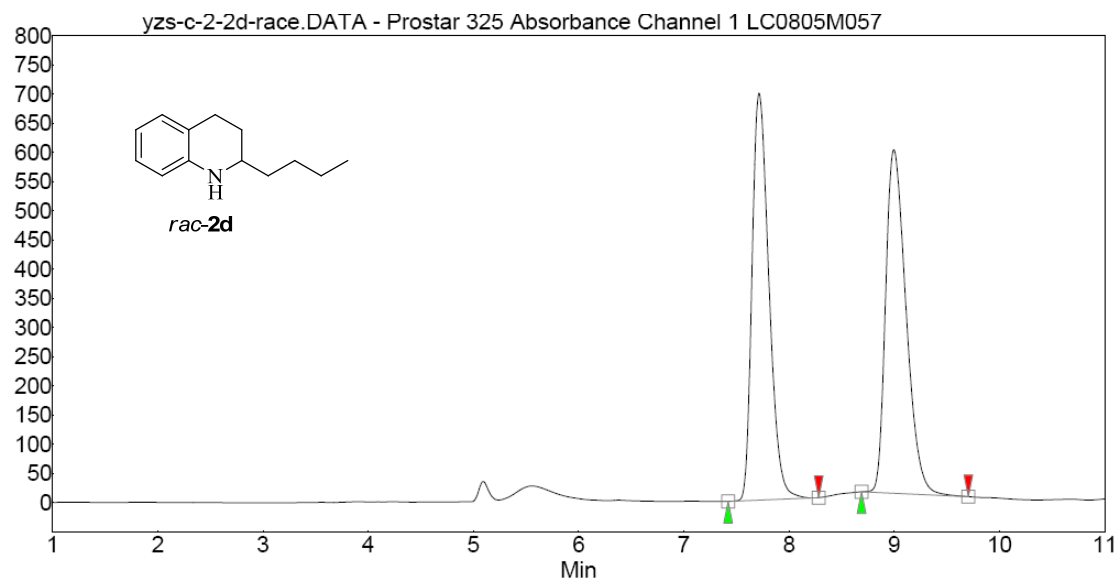

| Index | 文件名 | 时间 [Min] | 数量 [% 面积] | 高度 [mAU] | Area [mAU.Min] | Area % [%] |
|-------|-----|----------|-----------|----------|----------------|------------|
| 1     | 未知  | 7.71     | 49.36     | 697.3    | 129.4          | 49.365     |
| 2     | 未知  | 8.99     | 50.64     | 588.2    | 132.7          | 50.635     |
| Total |     |          | 100.00    | 1285.5   | 262.2          | 100.000    |

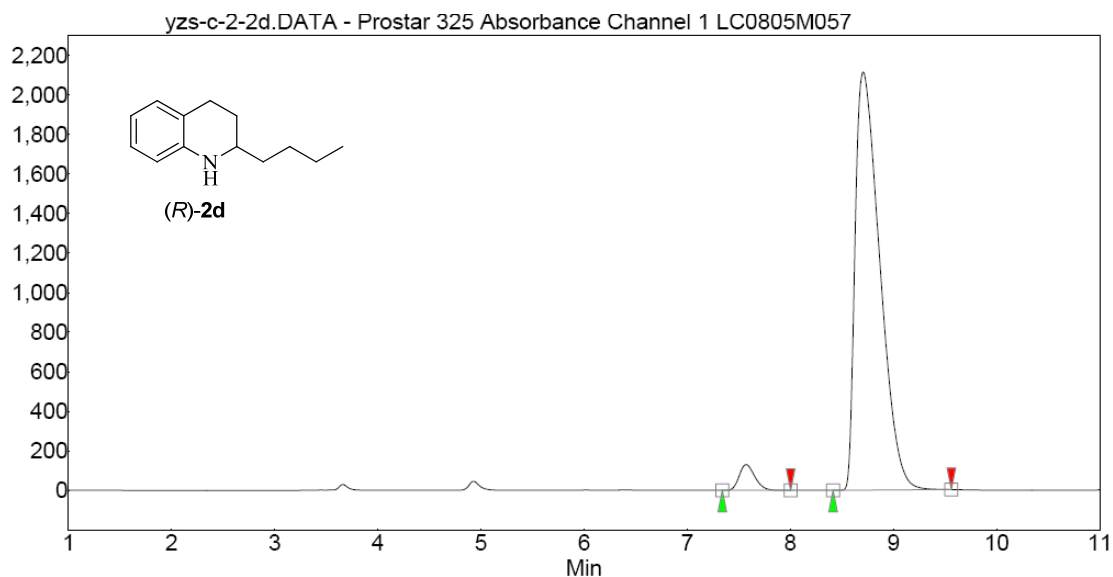

| Index | 文件名 | 时间 [Min] | 数量 [% 面积] | 高度 [mAU] | Area [mAU.Min] | Area % [%] |
|-------|-----|----------|-----------|----------|----------------|------------|
| 1     | 未知  | 7.57     | 3.77      | 130.1    | 22.9           | 3.766      |
| 2     | 未知  | 8.71     | 96.23     | 2113.7   | 584.4          | 96.234     |
| Total |     |          | 100.00    | 2243.8   | 607.2          | 100.000    |

## HPLC spectra of 2e catalyzed by (R,R)-3

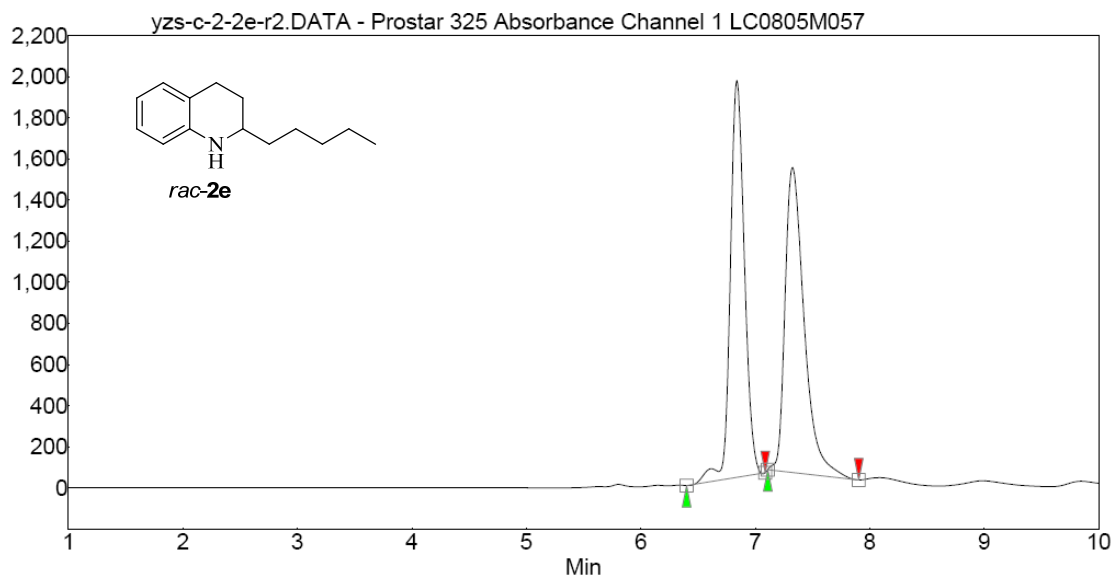

| Index | 文件名 | 时间 [Min] | 数量 [% 面积] | 高度 [mAU] | Area [mAU.Min] | Area % [%] |
|-------|-----|----------|-----------|----------|----------------|------------|
| 1     | 未知  | 6.84     | 49.08     | 1929.8   | 277.1          | 49.077     |
| 2     | 未知  | 7.33     | 50.92     | 1483.1   | 287.5          | 50.923     |
| Total |     |          | 100.00    | 3413.0   | 564.6          | 100.000    |

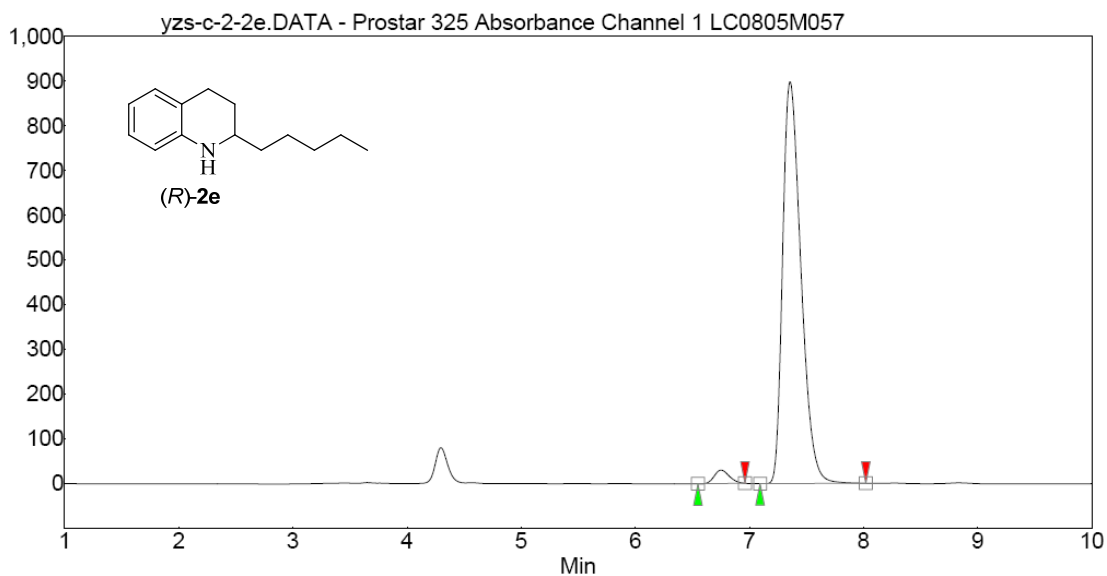

| Index | 文件名 | 时间 [Min] | 数量 [% 面积] | 高度 [mAU] | Area [mAU.Min] | Area % [%] |
|-------|-----|----------|-----------|----------|----------------|------------|
| 1     | 未知  | 6.75     | 2.68      | 30.1     | 4.6            | 2.676      |
| 2     | 未知  | 7.35     | 97.32     | 898.2    | 166.8          | 97.324     |
| Total |     |          | 100.00    | 928.3    | 171.4          | 100.000    |

## HPLC spectra of 2f catalyzed by (R,R)-3

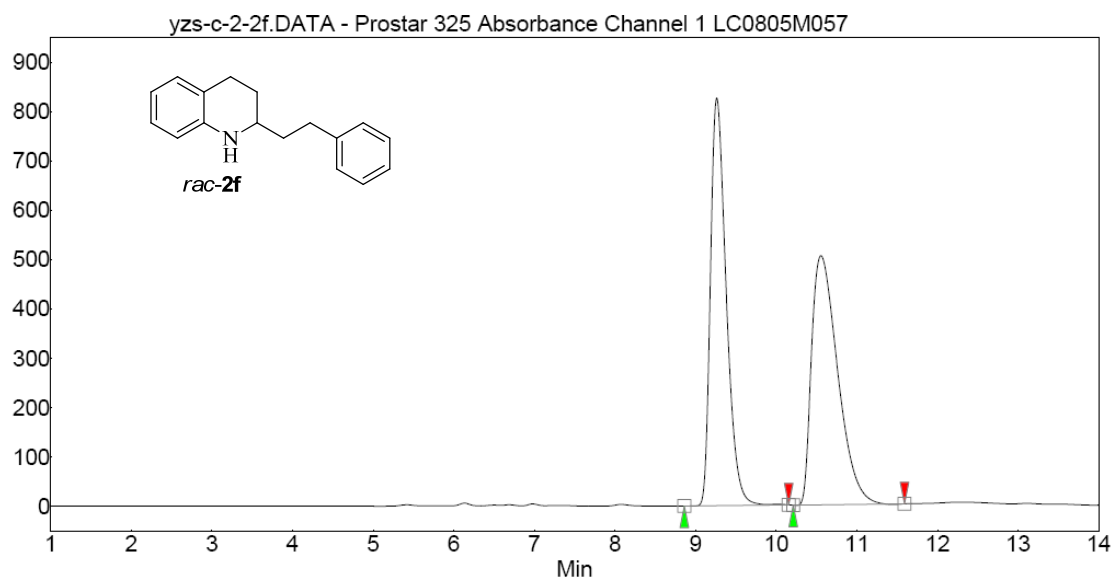

| Index | 文件名 | 时间 [Min] | 数量 [% 面积] | 高度 [mAU] | Area [mAU.Min] | Area % [%] |
|-------|-----|----------|-----------|----------|----------------|------------|
| 1     | 未知  | 9.26     | 49.66     | 826.3    | 187.0          | 49.664     |
| 2     | 未知  | 10.55    | 50.34     | 504.9    | 189.5          | 50.336     |
| Total |     |          | 100.00    | 1331.2   | 376.5          | 100.000    |

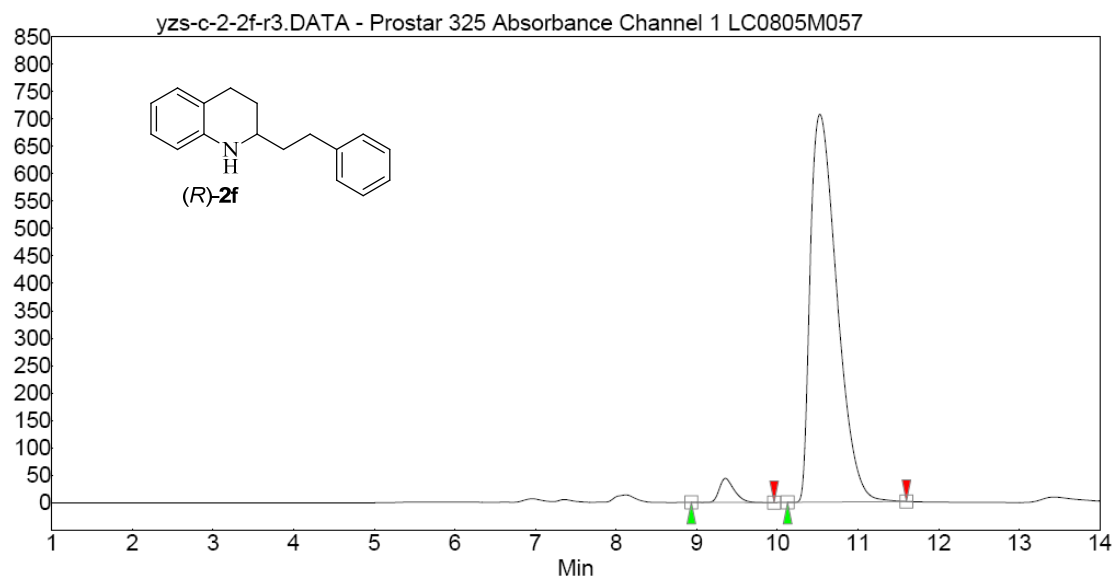

| Index | 文件名 | 时间 [Min] | 数量 [% 面积] | 高度 [mAU] | Area [mAU.Min] | Area % [%] |
|-------|-----|----------|-----------|----------|----------------|------------|
| 1     | 未知  | 9.35     | 3.35      | 44.0     | 9.4            | 3.349      |
| 2     | 未知  | 10.53    | 96.65     | 707.2    | 270.7          | 96.651     |
| Total |     |          | 100.00    | 751.2    | 280.1          | 100.000    |

## HPLC spectra of 2g catalyzed by (R,R)-3

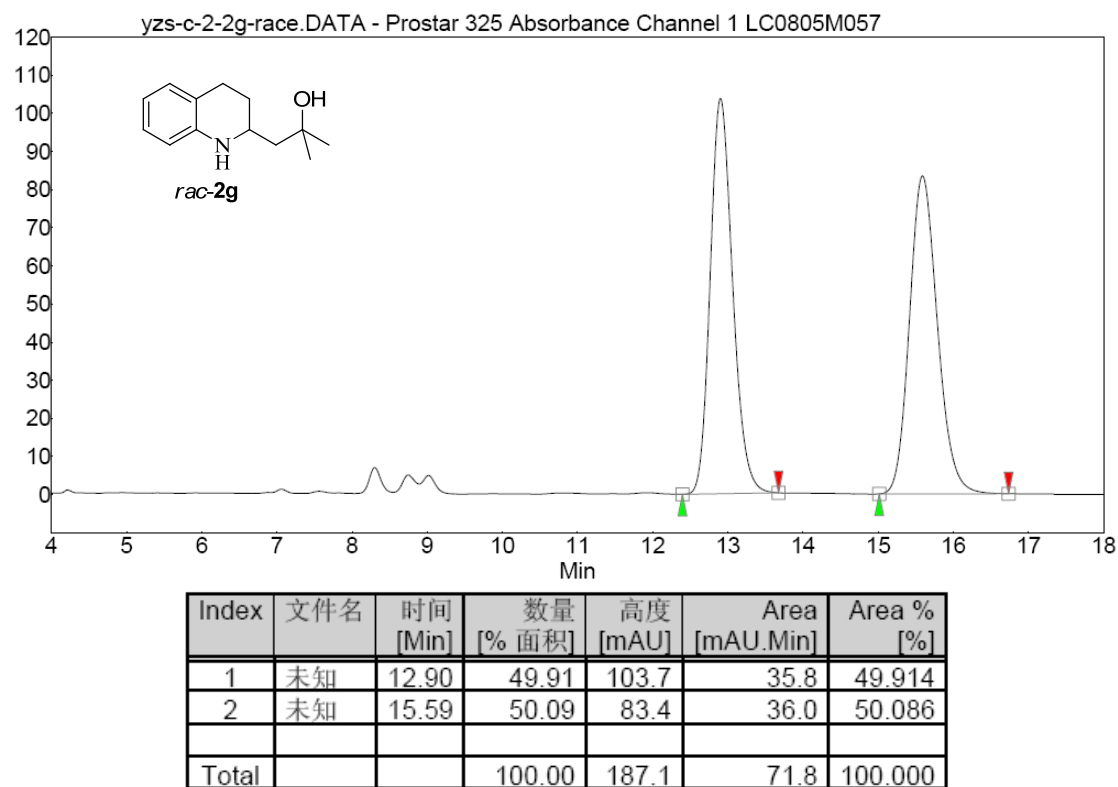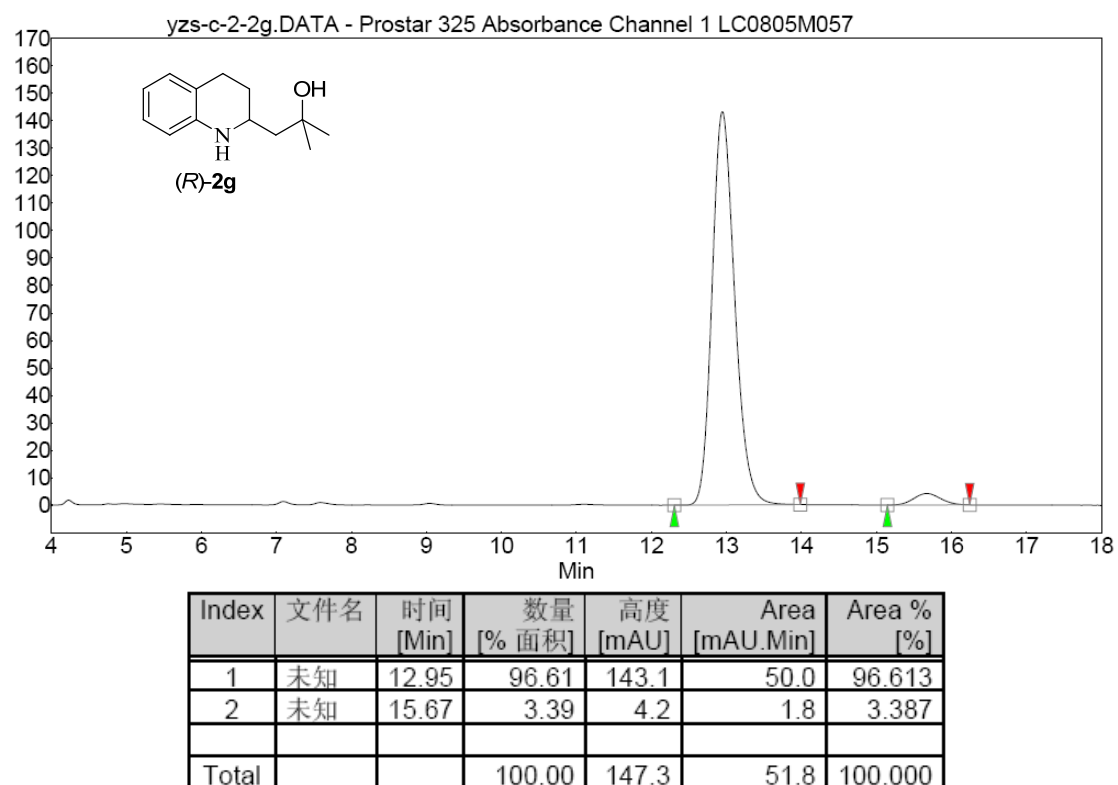

### HPLC spectra of 2k catalyzed by (R,R)-3

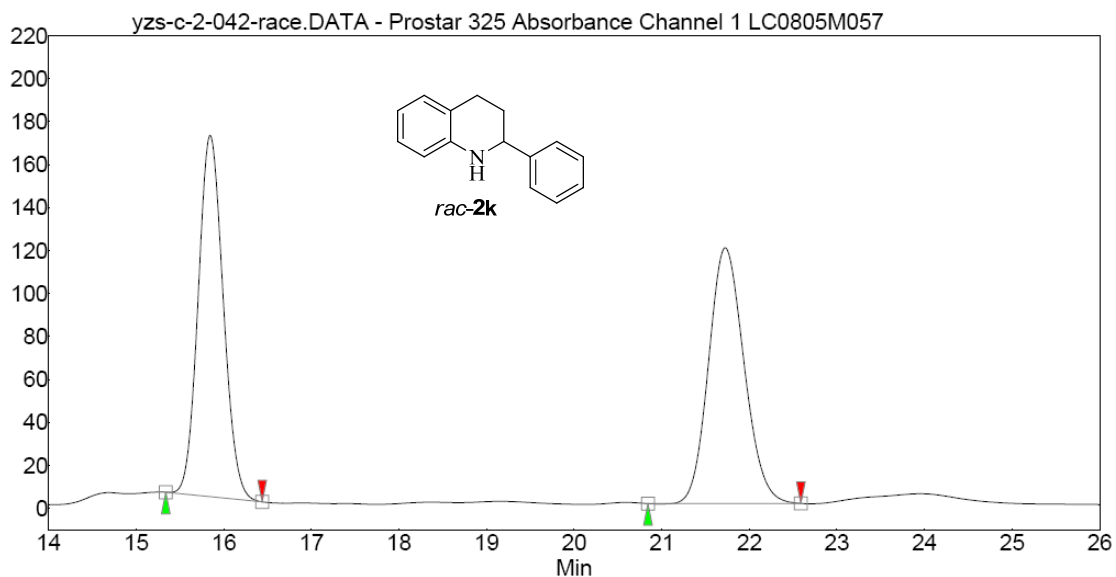

| Index | 文件名 | 时间 [Min] | 数量 [% 面积] | 高度 [mAU] | Area [mAU.Min] | Area % [%] |
|-------|-----|----------|-----------|----------|----------------|------------|
| 1     | 未知  | 15.35    | 49.64     | 462.4    | 150.3          | 49.645     |
| 2     | 未知  | 20.74    | 50.36     | 333.8    | 152.5          | 50.355     |
| Total |     |          | 100.00    | 796.2    | 302.8          | 100.000    |

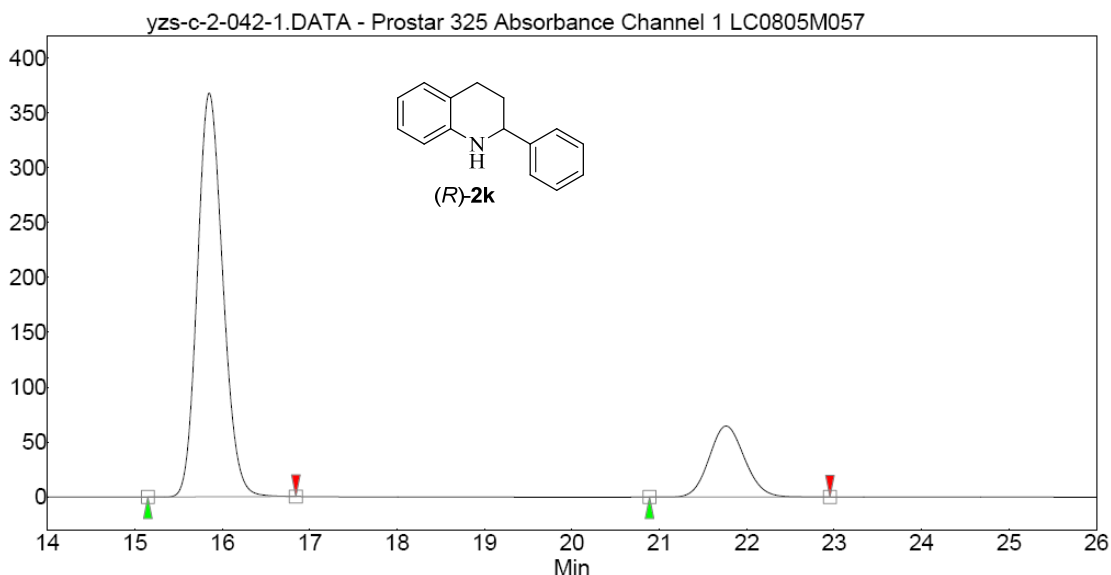

| Index | 文件名 | 时间 [Min] | 数量 [% 面积] | 高度 [mAU] | Area [mAU.Min] | Area % [%] |
|-------|-----|----------|-----------|----------|----------------|------------|
| 1     | 未知  | 15.39    | 81.63     | 1211.4   | 409.8          | 81.629     |
| 2     | 未知  | 20.83    | 18.37     | 205.7    | 92.2           | 18.371     |
| Total |     |          | 100.00    | 1417.2   | 502.0          | 100.000    |
